# Supplementary material for: The trials and triumphs of modelling X-ray absorption spectra of transition metal phthalocyanines
Source: Royal Society of Chemistry journal article supplement (doi:10.1039/d4cp01900h), 2024-01-01
Supplement: d4cp01900h1.pdf [file d4cp01900h1.pdf]

## Supporting Information for: The trials and triumphs of modelling X-ray absorption spectra of transition metal phthalocyanines

Esma Birsen Boydas<sup>a</sup> and Michael Roemelt<sup>\*,a</sup>

<sup>a</sup> *Institut für Chemie, Humboldt-Universität zu Berlin, Brook-Taylor-Straße 2, D-12489 Berlin*

### Contents

|          |                                                           |           |
|----------|-----------------------------------------------------------|-----------|
| <b>1</b> | <b>Experimental spectra in the SI</b>                     | <b>3</b>  |
| <b>2</b> | <b>ASS1ST results</b>                                     | <b>3</b>  |
| <b>3</b> | <b>Nitrogen K-edge</b>                                    | <b>5</b>  |
| <b>4</b> | <b>Transition metal L-edge</b>                            | <b>12</b> |
| <b>5</b> | <b>Example input block for TDDFT calculations</b>         | <b>15</b> |
| <b>6</b> | <b>Example input block for CASCI/NEVPT2 calculations</b>  | <b>15</b> |
| <b>7</b> | <b>Example configuration space for RASCI calculations</b> | <b>15</b> |
| <b>8</b> | <b>XYZ coordinates</b>                                    | <b>31</b> |
| 8.1      | CoPc . . . . .                                            | 31        |
| 8.2      | FePc . . . . .                                            | 32        |
| 8.3      | MnPc . . . . .                                            | 33        |
| 8.4      | CoPcF16 . . . . .                                         | 35        |
| 8.5      | FePcF16 . . . . .                                         | 36        |

### List of Figures

|    |                                                                             |   |
|----|-----------------------------------------------------------------------------|---|
| 1  | ASS1ST scheme for CoPcF16. . . . .                                          | 3 |
| 2  | ASS1ST scheme for FePc. . . . .                                             | 4 |
| 3  | ASS1ST scheme for MnPc. . . . .                                             | 4 |
| 4  | ASS1ST scheme for FePcF16. . . . .                                          | 5 |
| 11 | Natural difference orbitals (NDOs) for the nitrogen K-edge of CoPc. . . . . | 5 |

|    |                                                                                                                                                                                                                                                                                                                                                             |    |
|----|-------------------------------------------------------------------------------------------------------------------------------------------------------------------------------------------------------------------------------------------------------------------------------------------------------------------------------------------------------------|----|
| 5  | Experimental (black) and calculated (green) nitrogen K-edge XAS for TMPcF16s. Energies are given in eV units, and the intensities are normalized. The experimental spectra for CoPcF16 and FePcF16 were adapted from previous investigations by Balle <i>et al.</i> <sup>1</sup> and Greulich <i>et al.</i> , <sup>2</sup> respectively. . . . .            | 6  |
| 6  | Experimental and calculated N K-edge spectra for CoPc with ${}^2E_g$ symmetry. The transitions originating from $N_{\text{aza}}$ and $N_{\text{pyr}}$ are denoted with red and blue bars, respectively. The experimental data for CoPc on graphene/Pt(111) were taken from a study by Uihlein <i>et al.</i> <sup>3</sup> . . . . .                          | 6  |
| 7  | Experimental and calculated N K-edge spectra for FePc with ${}^3A_{1g}$ symmetry. The transitions originating from $N_{\text{aza}}$ and $N_{\text{pyr}}$ are denoted with red and blue bars, respectively. The experimental data for FePc on rutile $\text{TiO}_2(110)$ were adapted from a previous study of Karstens <i>et al.</i> <sup>4</sup> . . . . . | 7  |
| 8  | Experimental and calculated N K-edge spectra for CoPcF16 with ${}^2E_g$ symmetry. The transitions originating from $N_{\text{aza}}$ and $N_{\text{pyr}}$ are denoted with red and blue bars, respectively. The experimental curves of CoPcF16 on Ni(111) were taken from a previous study Balle <i>et al.</i> <sup>1</sup> . . . . .                        | 7  |
| 9  | Experimental and calculated F K-edge spectra for FePcF16. Only one 1s orbital per fluorine-type ( $F_{\text{inner}}$ and $F_{\text{outer}}$ ) has been taking into account. The experimental results were taken from a previous study on Cu(111) surfaces. <sup>5</sup> . . . . .                                                                           | 8  |
| 10 | Calculated fluorine K-edge of CoPcF16 (top) and FePcF16 (bottom). Only the lowest energy transitions are shown. . . . .                                                                                                                                                                                                                                     | 8  |
| 12 | Natural difference orbitals (NDOs) for the nitrogen K-edge of FePc. . . . .                                                                                                                                                                                                                                                                                 | 9  |
| 13 | Natural difference orbitals (NDOs) for the nitrogen K-edge of MnPc. . . . .                                                                                                                                                                                                                                                                                 | 9  |
| 14 | Natural difference orbitals (NDOs) for the nitrogen K-edge of CoPcF16. . . . .                                                                                                                                                                                                                                                                              | 10 |
| 15 | Natural difference orbitals (NDOs) for the nitrogen K-edge of FePcF16. . . . .                                                                                                                                                                                                                                                                              | 11 |
| 16 | Natural difference orbitals (NDOs) for the fluorine K-edge of CoPcF16. . . . .                                                                                                                                                                                                                                                                              | 11 |
| 17 | Natural difference orbitals (NDOs) for the fluorine K-edge of FePcF16. . . . .                                                                                                                                                                                                                                                                              | 12 |
| 18 | Calculated Co L-edge XAS of CoPcF16 (along with CoPc spectra in grey) for comparison. . . . .                                                                                                                                                                                                                                                               | 12 |
| 19 | Calculated Fe L-edge XAS of FePcF16 (along with FePc spectra in grey) for comparison. . . . .                                                                                                                                                                                                                                                               | 13 |
| 20 | Active orbitals of the extended active space. Gouterman-like ligand orbitals as well as metal based 3d orbitals are included in the active manifold. . . . .                                                                                                                                                                                                | 14 |
| 21 | Experimental and calculated Mn L-edge XAS for MnPc. The experimental results were adapted from a previous study on Ag(111) surfaces. <sup>6</sup> . . . . .                                                                                                                                                                                                 | 14 |

## 1 Experimental spectra in the SI

- The N K-edge experimental data for CoPcF16 was adapted from a previous study by Balle *et al.* with the title "Influence of the Fluorination of CoPc on the Interfacial

Electronic Structure of the Coordinated Metal Ion”.<sup>1</sup> Copyright © 2017, American Chemical Society.

- The N K-edge experimental data for FePcF16 was adapted from a previous study by Greulich *et al.* with the title ”Influence of the Fluorination of Iron Phthalocyanine on the Electronic Structure of the Central Metal Atom”.<sup>2</sup> Copyright © 2021 The Authors. Published by American Chemical Society.
- The K-edge experimental data for CoPc were taken from a study by Uihlein *et al.*, with the title ”Influence of Graphene on Charge Transfer between CoPc and Metals: The Role of Graphene–Substrate Coupling”.<sup>3</sup> This article is an open access article distributed under the terms and conditions of the Creative Commons Attribution (CC BY) license (<http://creativecommons.org/licenses/by/4.0/>) Copyright © 2011, American Chemical Society.
- The fluorine K-edge experimental spectra of FePcF16 were adapted from a previous study by Belser *et al.* with the title ”Interaction Channels Between Perfluorinated Iron Phthalocyanine and Cu(111)”<sup>5</sup> Copyright © 2018 WILEY-VCH Verlag GmbH & Co. KGaA, Weinheim.

## 2 ASS1ST results

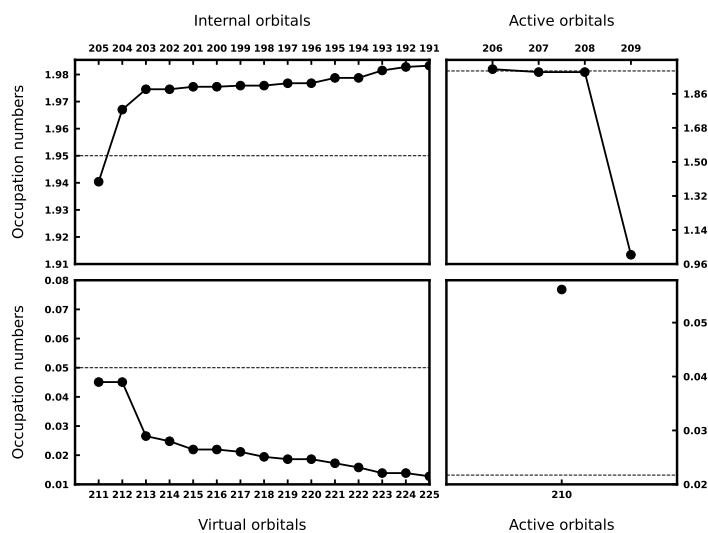

Figure 1 ASS1ST scheme for CoPcF16.

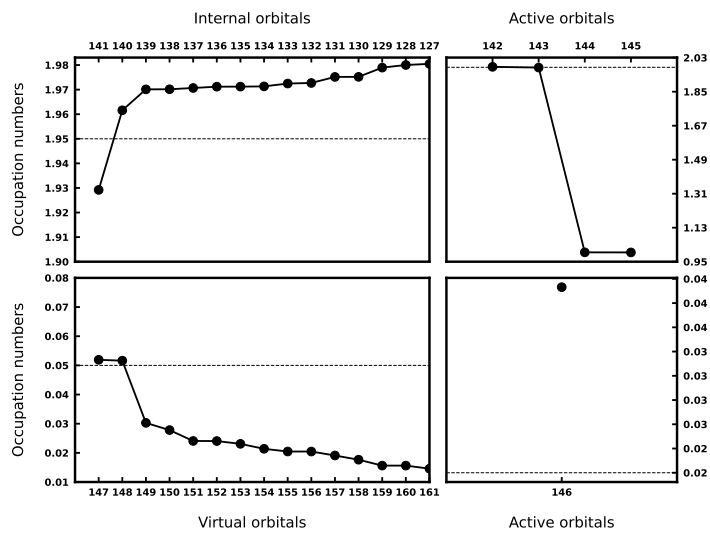

Figure 2 ASS1ST scheme for FePc.

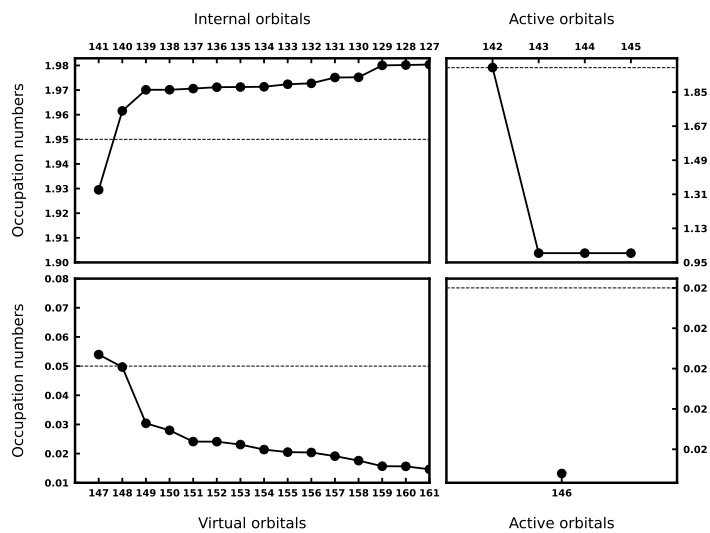

Figure 3 ASS1ST scheme for MnPc.



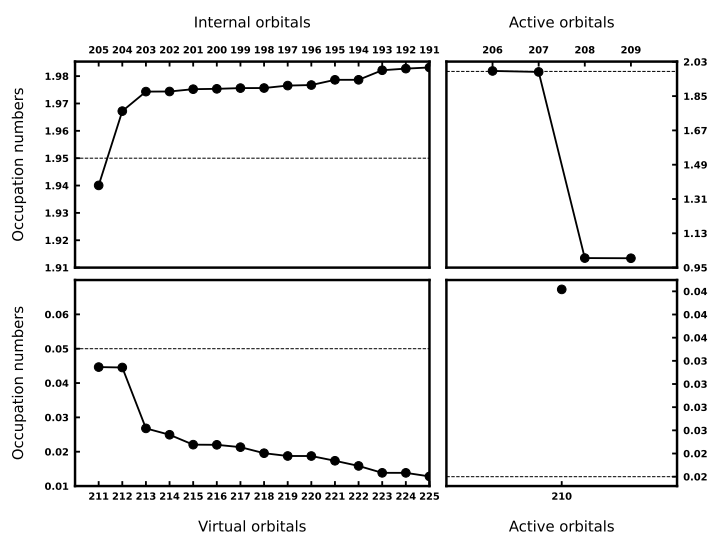

**Figure 4** ASSIST scheme for FePcF16.

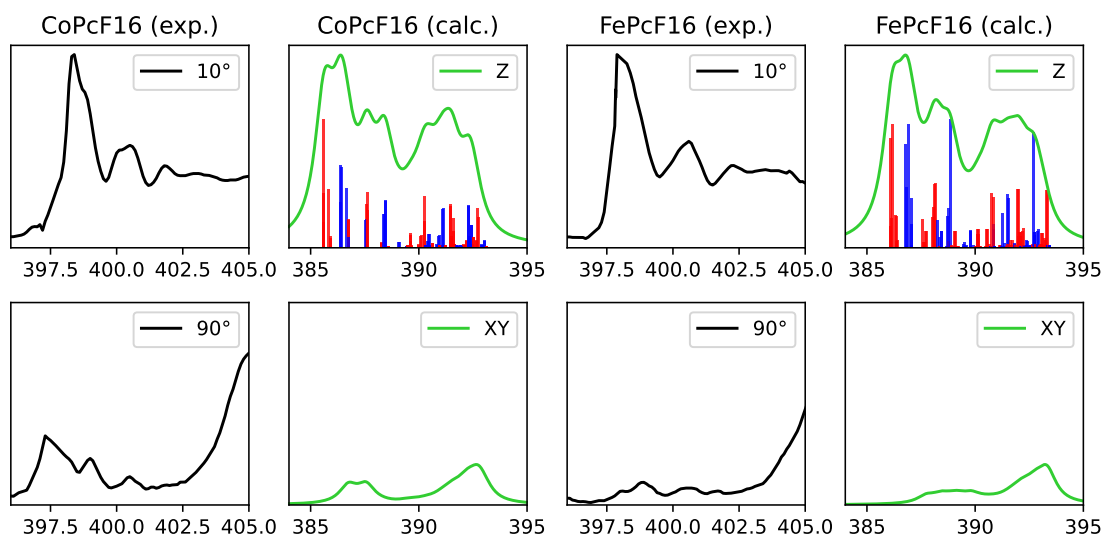

**Figure 5** Experimental (black) and calculated (green) nitrogen K-edge XAS for TMPcF16s. Energies are given in eV units, and the intensities are normalized. The experimental spectra for CoPcF16 and FePcF16 were adapted from previous investigations by Balle *et al.*<sup>1</sup> and Greulich *et al.*,<sup>2</sup> respectively.

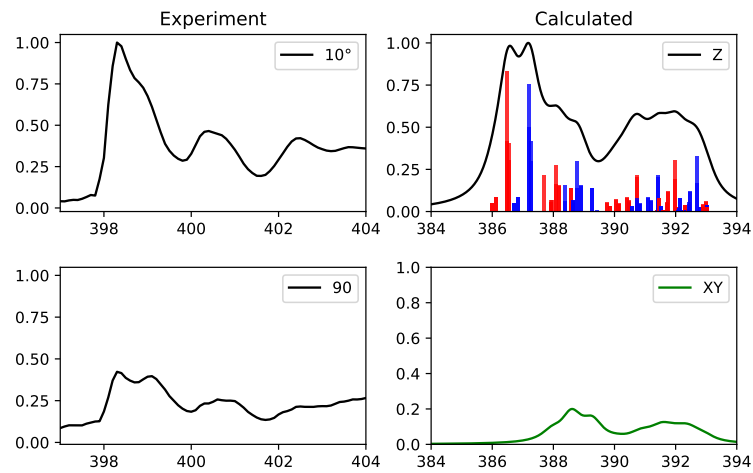

**Figure 6** Experimental and calculated N K-edge spectra for CoPc with  ${}^2E_g$  symmetry. The transitions originating from  $N_{\text{aza}}$  and  $N_{\text{pyr}}$  are denoted with red and blue bars, respectively. The experimental data for CoPc on graphene/Pt(111) were taken from a study by Uihlein *et al.*<sup>3</sup>

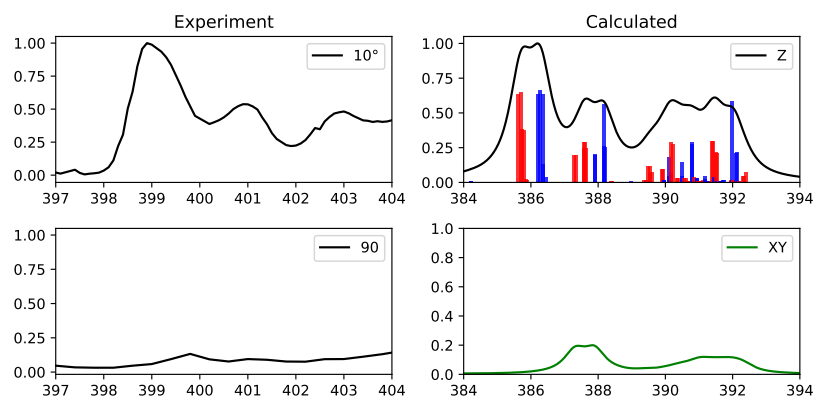

**Figure 7** Experimental and calculated N K-edge spectra for FePc with  ${}^3A_{1g}$  symmetry. The transitions originating from  $N_{\text{aza}}$  and  $N_{\text{pyr}}$  are denoted with red and blue bars, respectively. The experimental data for FePc on rutile  $\text{TiO}_2(110)$  were adapted from a previous study of Karstens *et al.*<sup>4</sup>

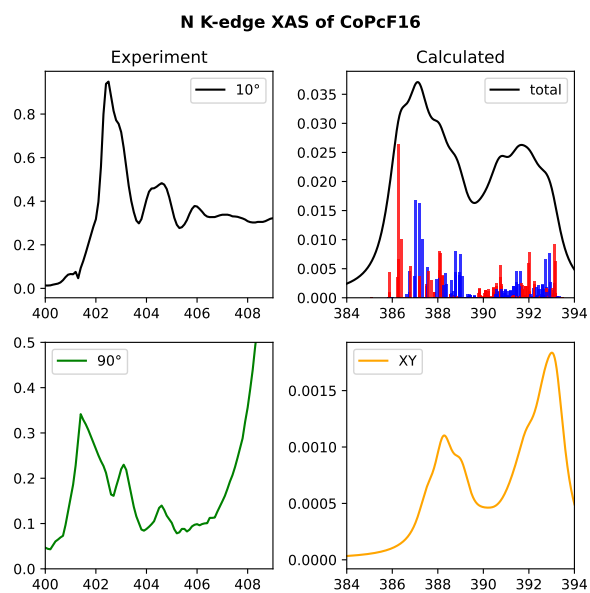

**Figure 8** Experimental and calculated N K-edge spectra for CoPcF16 with  ${}^2E_g$  symmetry. The transitions originating from  $N_{\text{aza}}$  and  $N_{\text{pyr}}$  are denoted with red and blue bars, respectively. The experimental curves of CoPcF16 on Ni(111) were taken from a previous study Balle *et al.*<sup>1</sup>

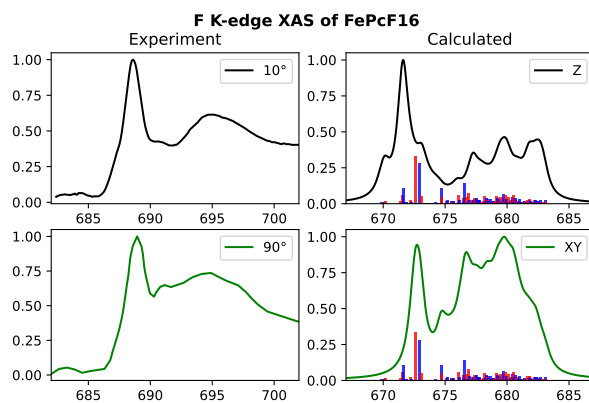

**Figure 9** Experimental and calculated F K-edge spectra for FePcF16. Only one 1s orbital per fluorine-type ( $F_{\text{inner}}$  and  $F_{\text{outer}}$ ) has been taken into account. The experimental results were taken from a previous study on Cu(111) surfaces.<sup>5</sup>

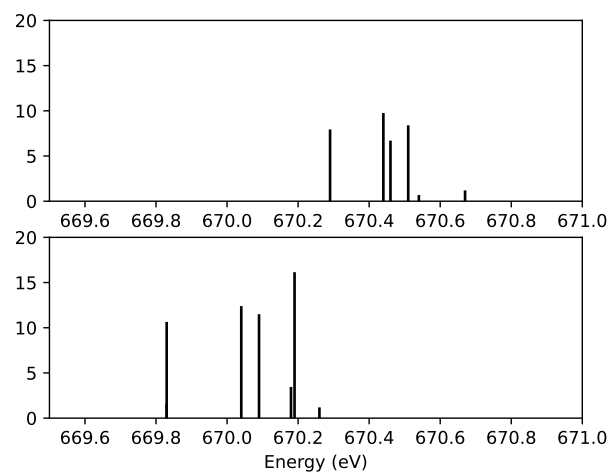

**Figure 10** Calculated fluorine K-edge of CoPcF16 (top) and FePcF16 (bottom). Only the lowest energy transitions are shown.

### 3 Nitrogen K-edge

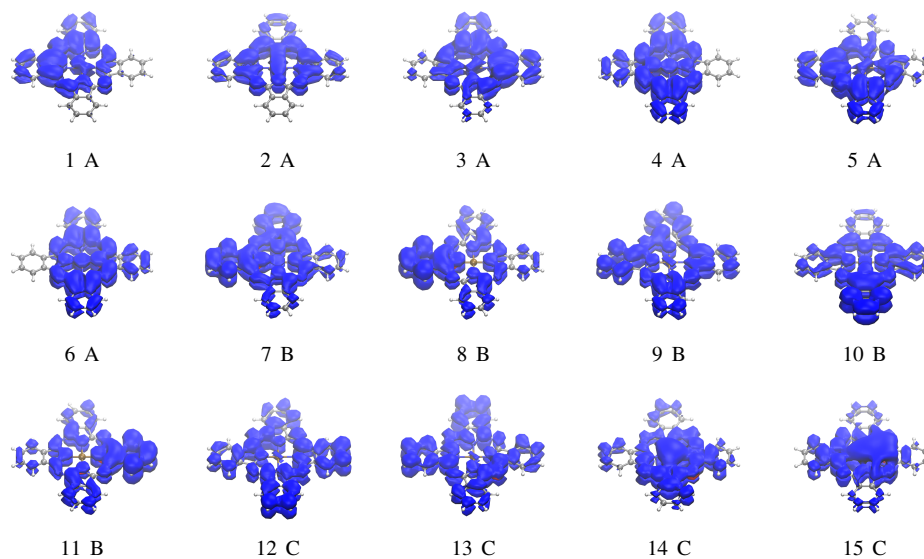

**Figure 11** Natural difference orbitals (NDOs) for the nitrogen K-edge of CoPc.

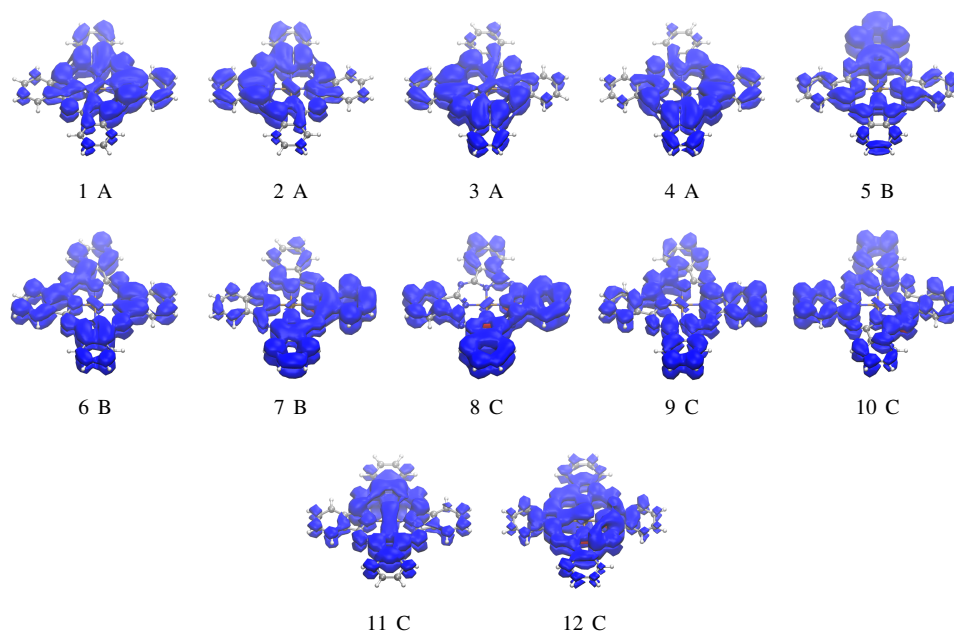

**Figure 12** Natural difference orbitals (NDOs) for the nitrogen K-edge of FePc.

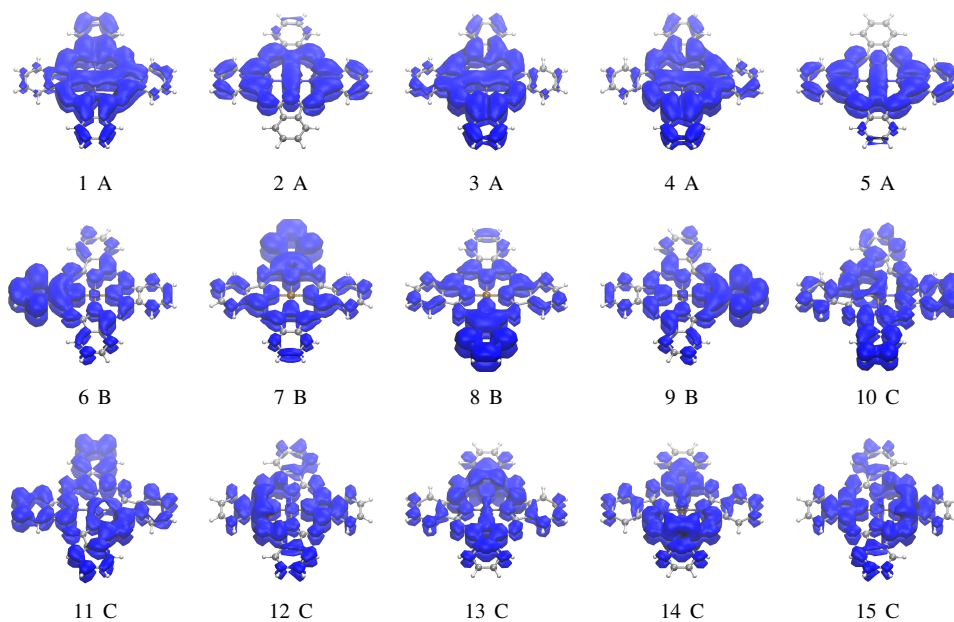

**Figure 13** Natural difference orbitals (NDOs) for the nitrogen K-edge of MnPc.

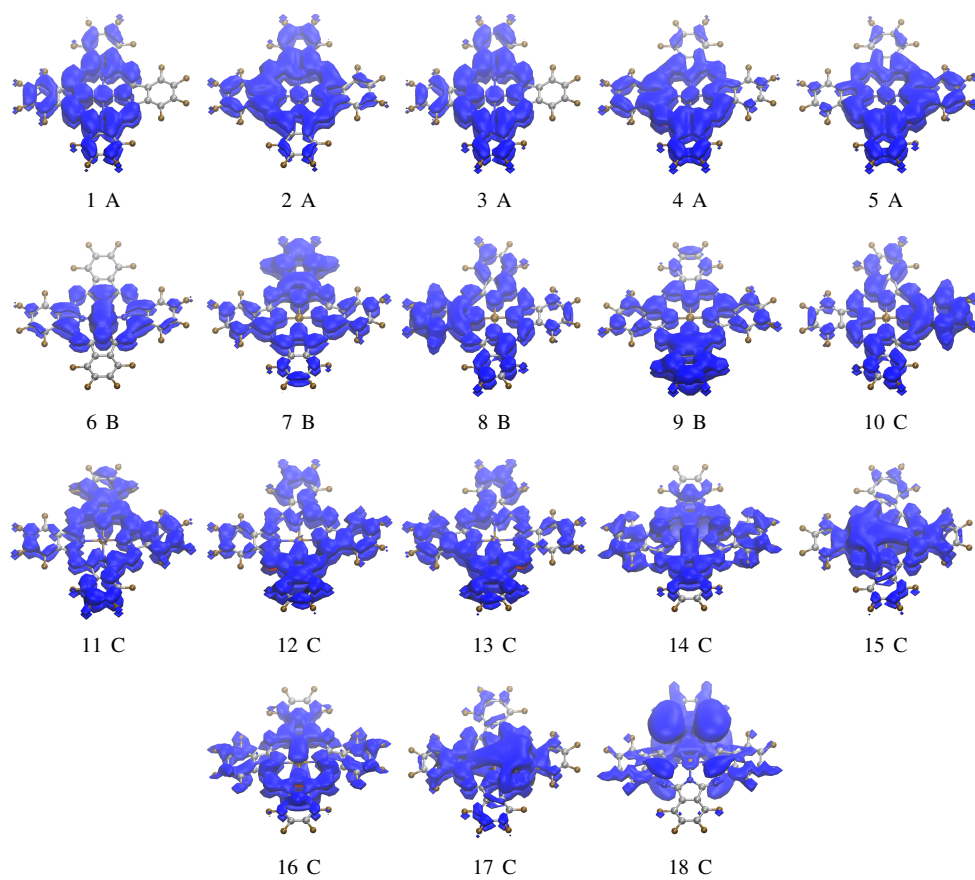

**Figure 14** Natural difference orbitals (NDOs) for the nitrogen K-edge of CoPcF16.

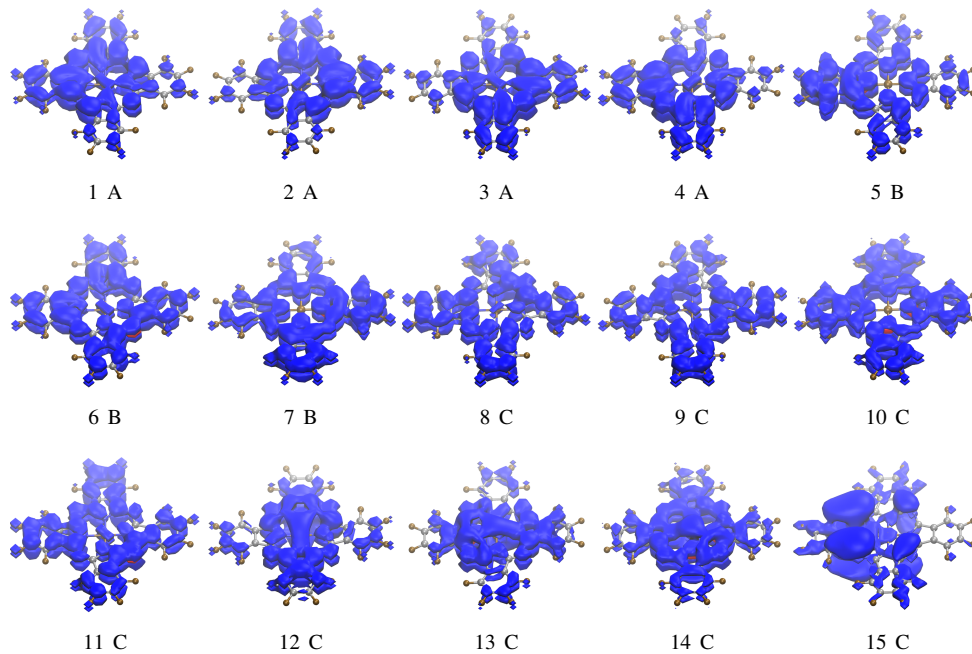

**Figure 15** Natural difference orbitals (NDOs) for the nitrogen K-edge of FePcF16.

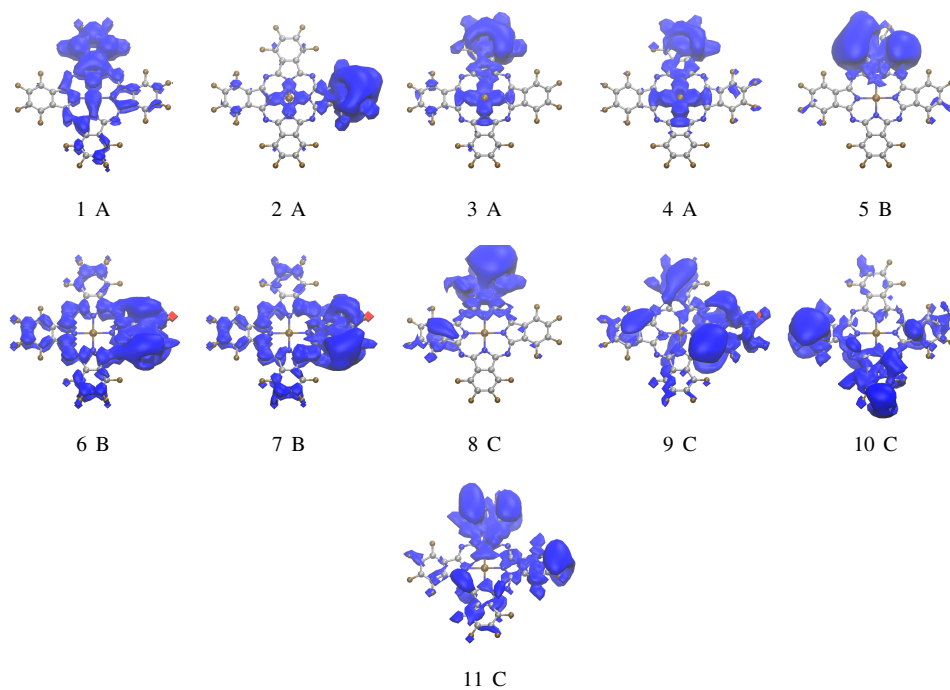

**Figure 16** Natural difference orbitals (NDOs) for the fluorine K-edge of CoPcF16.

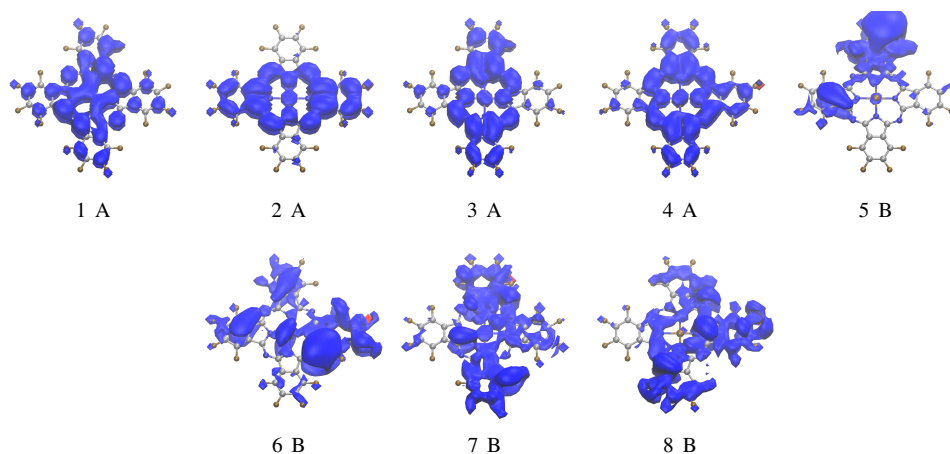

**Figure 17** Natural difference orbitals (NDOs) for the fluorine K-edge of FePcF16.

## 4 Transition metal L-edge

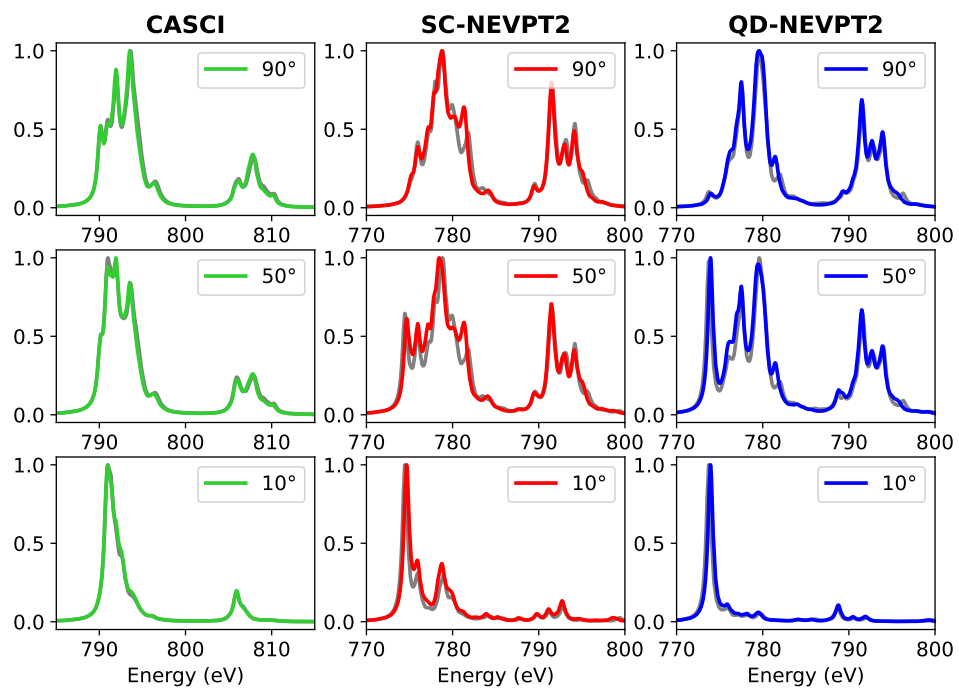

**Figure 18** Calculated Co L-edge XAS of CoPcF16 (along with CoPc spectra in grey) for comparison.



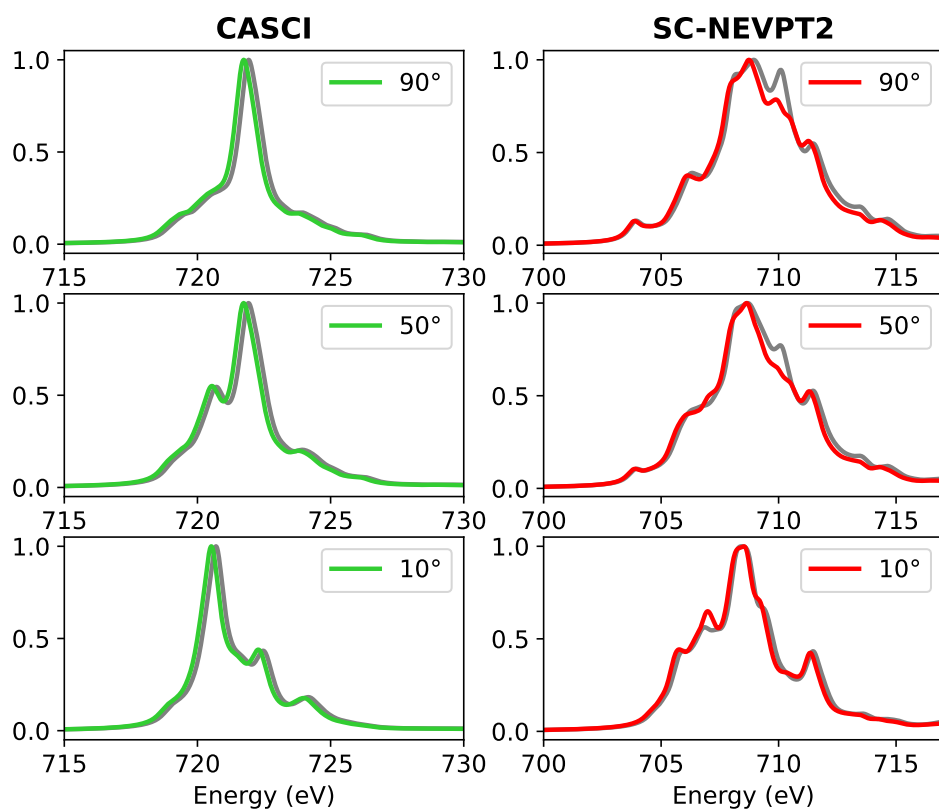

**Figure 19** Calculated Fe L-edge XAS of FePcF16 (along with FePc spectra in grey) for comparison.

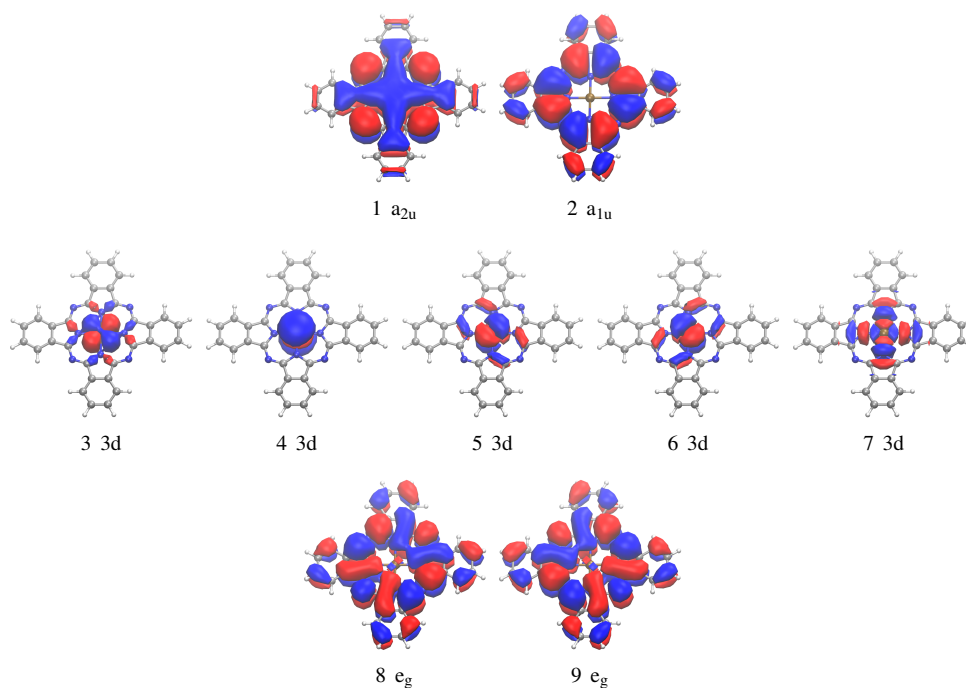

**Figure 20** Active orbitals of the extended active space. Gouterman-like ligand orbitals as well as metal based 3d orbitals are included in the active manifold.

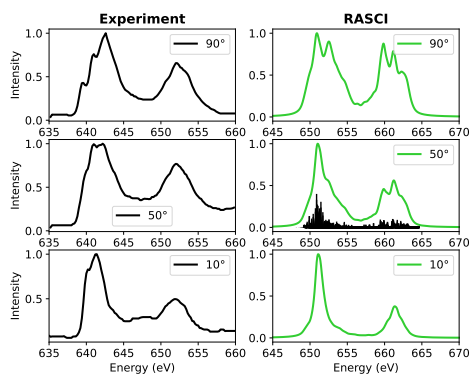

**Figure 21** Experimental and calculated Mn L-edge XAS for MnPc. The experimental results were adapted from a previous study on Ag(111) surfaces.<sup>6</sup>

## 5 Example input block for TDDFT calculations

```
%tddft NRoots 500
XASLoc[0] = 5,12
XASLoc[1] = 5,12
OrbWin[0] = 5,12,-1,-1
OrbWin[1] = 5,12,-1,-1
DoQuad True
TDA True
end
```

## 6 Example input block for CASCI/NEVPT2 calculations

```
%casscf
nel 13
norb 8
mult 4,2
nroots 40,115
TrafoStep RI
MaxIter 1
rel dosoc true end
PTMethod SC_NEVPT2
PTSettings
QDtype 3
end
end
```

## 7 Example configuration space for RASCI calculations

```
%casscf
nel 16
norb 12
mult 5,3,1
nroots 200,200,200
TrafoStep RI
rel dosoc true
dodtensor false
end
maxiter 1
refs
...
```

```

{ 1 2 2 0 2 0 0 2 1 2 2 2 }
{ 1 2 2 0 2 0 0 2 2 1 2 2 }
{ 1 2 2 0 2 0 0 2 2 2 1 2 }
{ 1 2 2 0 2 0 0 2 2 2 2 1 }
{ 1 2 2 0 2 0 1 0 2 2 2 2 }
{ 1 2 2 0 2 0 1 1 1 2 2 2 }
{ 1 2 2 0 2 0 1 1 2 1 2 2 }
{ 1 2 2 0 2 0 1 1 2 2 1 2 }
{ 1 2 2 0 2 0 1 1 2 2 2 1 }
{ 1 2 2 0 2 0 1 2 0 2 2 2 }
{ 1 2 2 0 2 0 1 2 1 1 2 2 }
{ 1 2 2 0 2 0 1 2 1 2 1 2 }
{ 1 2 2 0 2 0 1 2 1 2 2 1 }
{ 1 2 2 0 2 0 1 2 2 0 2 2 }
{ 1 2 2 0 2 0 1 2 2 1 1 2 }
{ 1 2 2 0 2 0 1 2 2 1 2 1 }
{ 1 2 2 0 2 0 1 2 2 2 0 2 }
{ 1 2 2 0 2 0 1 2 2 2 1 1 }
{ 1 2 2 0 2 0 1 2 2 2 2 0 }
{ 1 2 2 0 2 0 2 0 1 2 2 2 }
{ 1 2 2 0 2 0 2 0 2 1 2 2 }
{ 1 2 2 0 2 0 2 0 2 2 1 2 }
{ 1 2 2 0 2 0 2 0 2 2 2 1 }
{ 1 2 2 0 2 0 2 1 0 2 2 2 }
{ 1 2 2 0 2 0 2 1 1 1 2 2 }
{ 1 2 2 0 2 0 2 1 1 2 1 2 }
{ 1 2 2 0 2 0 2 1 1 2 2 1 }
{ 1 2 2 0 2 0 2 1 2 0 2 2 }
{ 1 2 2 0 2 0 2 1 2 1 1 2 }
{ 1 2 2 0 2 0 2 1 2 1 2 1 }
{ 1 2 2 0 2 0 2 1 2 2 0 2 }
{ 1 2 2 0 2 0 2 1 2 2 1 1 }
{ 1 2 2 0 2 0 2 1 2 2 2 0 }
{ 1 2 2 0 2 0 2 2 0 1 2 2 }
{ 1 2 2 0 2 0 2 2 0 2 1 2 }
{ 1 2 2 0 2 0 2 2 0 2 2 1 }
{ 1 2 2 0 2 0 2 2 1 0 2 2 }
{ 1 2 2 0 2 0 2 2 1 1 1 2 }
{ 1 2 2 0 2 0 2 2 1 1 2 1 }
{ 1 2 2 0 2 0 2 2 1 2 0 2 }
{ 1 2 2 0 2 0 2 2 1 2 1 1 }
{ 1 2 2 0 2 0 2 2 1 2 2 0 }

```

{ 1 2 2 0 2 0 2 2 2 0 1 2 }  
 { 1 2 2 0 2 0 2 2 2 0 2 1 }  
 { 1 2 2 0 2 0 2 2 2 1 0 2 }  
 { 1 2 2 0 2 0 2 2 2 1 1 1 }  
 { 1 2 2 0 2 0 2 2 2 1 2 0 }  
 { 1 2 2 0 2 0 2 2 2 2 0 1 }  
 { 1 2 2 0 2 0 2 2 2 2 1 0 }  
 { 1 2 2 0 2 1 0 0 2 2 2 2 }  
 { 1 2 2 0 2 1 0 1 1 2 2 2 }  
 { 1 2 2 0 2 1 0 1 2 1 2 2 }  
 { 1 2 2 0 2 1 0 1 2 2 1 2 }  
 { 1 2 2 0 2 1 0 1 2 2 2 1 }  
 { 1 2 2 0 2 1 0 2 0 2 2 2 }  
 { 1 2 2 0 2 1 0 2 1 1 2 2 }  
 { 1 2 2 0 2 1 0 2 1 2 1 2 }  
 { 1 2 2 0 2 1 0 2 1 2 2 1 }  
 { 1 2 2 0 2 1 0 2 2 0 2 2 }  
 { 1 2 2 0 2 1 0 2 2 1 1 2 }  
 { 1 2 2 0 2 1 0 2 2 1 2 1 }  
 { 1 2 2 0 2 1 0 2 2 2 0 2 }  
 { 1 2 2 0 2 1 0 2 2 2 1 1 }  
 { 1 2 2 0 2 1 0 2 2 2 2 0 }  
 { 1 2 2 0 2 1 1 0 1 2 2 2 }  
 { 1 2 2 0 2 1 1 0 2 1 2 2 }  
 { 1 2 2 0 2 1 1 0 2 2 1 2 }  
 { 1 2 2 0 2 1 1 0 2 2 2 1 }  
 { 1 2 2 0 2 1 1 1 0 2 2 2 }  
 { 1 2 2 0 2 1 1 1 1 1 2 2 }  
 { 1 2 2 0 2 1 1 1 1 2 1 2 }  
 { 1 2 2 0 2 1 1 1 1 2 2 1 }  
 { 1 2 2 0 2 1 1 1 2 0 2 2 }  
 { 1 2 2 0 2 1 1 1 2 2 1 1 }  
 { 1 2 2 0 2 1 1 1 2 2 2 0 }  
 { 1 2 2 0 2 1 1 2 0 1 2 2 }  
 { 1 2 2 0 2 1 1 2 0 2 1 2 }  
 { 1 2 2 0 2 1 1 2 0 2 2 1 }  
 { 1 2 2 0 2 1 1 2 1 0 2 2 }  
 { 1 2 2 0 2 1 1 2 1 1 1 2 }  
 { 1 2 2 0 2 1 1 2 1 1 2 1 }

{ 1 2 2 0 2 1 1 2 1 2 0 2 }  
 { 1 2 2 0 2 1 1 2 1 2 1 1 }  
 { 1 2 2 0 2 1 1 2 1 2 2 0 }  
 { 1 2 2 0 2 1 1 2 2 0 1 2 }  
 { 1 2 2 0 2 1 1 2 2 0 2 1 }  
 { 1 2 2 0 2 1 1 2 2 1 0 2 }  
 { 1 2 2 0 2 1 1 2 2 1 1 1 }  
 { 1 2 2 0 2 1 1 2 2 1 2 0 }  
 { 1 2 2 0 2 1 1 2 2 2 0 1 }  
 { 1 2 2 0 2 1 1 2 2 2 1 0 }  
 { 1 2 2 0 2 1 2 0 0 2 2 2 }  
 { 1 2 2 0 2 1 2 0 1 1 2 2 }  
 { 1 2 2 0 2 1 2 0 1 2 1 2 }  
 { 1 2 2 0 2 1 2 0 1 2 2 1 }  
 { 1 2 2 0 2 1 2 0 2 0 2 2 }  
 { 1 2 2 0 2 1 2 0 2 1 1 2 }  
 { 1 2 2 0 2 1 2 0 2 1 2 1 }  
 { 1 2 2 0 2 1 2 0 2 2 0 2 }  
 { 1 2 2 0 2 1 2 0 2 2 1 1 }  
 { 1 2 2 0 2 1 2 0 2 2 2 0 }  
 { 1 2 2 0 2 1 2 1 0 1 2 2 }  
 { 1 2 2 0 2 1 2 1 0 2 1 2 }  
 { 1 2 2 0 2 1 2 1 0 2 2 1 }  
 { 1 2 2 0 2 1 2 1 1 0 2 2 }  
 { 1 2 2 0 2 1 2 1 1 1 1 2 }  
 { 1 2 2 0 2 1 2 1 1 1 2 1 }  
 { 1 2 2 0 2 1 2 1 1 2 0 2 }  
 { 1 2 2 0 2 1 2 1 1 2 1 1 }  
 { 1 2 2 0 2 1 2 1 1 2 2 0 }  
 { 1 2 2 0 2 1 2 1 2 0 1 2 }  
 { 1 2 2 0 2 1 2 1 2 0 2 1 }  
 { 1 2 2 0 2 1 2 1 2 1 0 2 }  
 { 1 2 2 0 2 1 2 1 2 1 1 1 }  
 { 1 2 2 0 2 1 2 1 2 1 2 0 }  
 { 1 2 2 0 2 1 2 1 2 2 0 1 }  
 { 1 2 2 0 2 1 2 1 2 2 1 0 }  
 { 1 2 2 0 2 1 2 2 0 0 2 2 }  
 { 1 2 2 0 2 1 2 2 0 1 1 2 }  
 { 1 2 2 0 2 1 2 2 0 1 2 1 }  
 { 1 2 2 0 2 1 2 2 0 2 0 2 }  
 { 1 2 2 0 2 1 2 2 0 2 1 1 }  
 { 1 2 2 0 2 1 2 2 0 2 2 0 }

{ 1 2 2 0 2 1 2 2 1 0 1 2 }  
 { 1 2 2 0 2 1 2 2 1 0 2 1 }  
 { 1 2 2 0 2 1 2 2 1 1 0 2 }  
 { 1 2 2 0 2 1 2 2 1 1 1 1 }  
 { 1 2 2 0 2 1 2 2 1 1 2 0 }  
 { 1 2 2 0 2 1 2 2 1 2 0 1 }  
 { 1 2 2 0 2 1 2 2 1 2 1 0 }  
 { 1 2 2 0 2 1 2 2 2 0 0 2 }  
 { 1 2 2 0 2 1 2 2 2 0 1 1 }  
 { 1 2 2 0 2 1 2 2 2 0 2 0 }  
 { 1 2 2 0 2 1 2 2 2 1 0 1 }  
 { 1 2 2 0 2 1 2 2 2 1 1 0 }  
 { 1 2 2 0 2 1 2 2 2 2 0 0 }  
 { 1 2 2 0 2 2 0 0 1 2 2 2 }  
 { 1 2 2 0 2 2 0 0 2 1 2 2 }  
 { 1 2 2 0 2 2 0 0 2 2 1 2 }  
 { 1 2 2 0 2 2 0 0 2 2 2 1 }  
 { 1 2 2 0 2 2 0 1 0 2 2 2 }  
 { 1 2 2 0 2 2 0 1 1 1 2 2 }  
 { 1 2 2 0 2 2 0 1 1 2 1 2 }  
 { 1 2 2 0 2 2 0 1 1 2 2 1 }  
 { 1 2 2 0 2 2 0 1 2 0 2 2 }  
 { 1 2 2 0 2 2 0 1 2 1 1 2 }  
 { 1 2 2 0 2 2 0 1 2 1 2 1 }  
 { 1 2 2 0 2 2 0 1 2 2 0 2 }  
 { 1 2 2 0 2 2 0 1 2 2 1 1 }  
 { 1 2 2 0 2 2 0 1 2 2 2 0 }  
 { 1 2 2 0 2 2 0 2 0 1 2 2 }  
 { 1 2 2 0 2 2 0 2 0 2 1 2 }  
 { 1 2 2 0 2 2 0 2 0 2 2 1 }  
 { 1 2 2 0 2 2 0 2 1 0 2 2 }  
 { 1 2 2 0 2 2 0 2 1 1 1 2 }  
 { 1 2 2 0 2 2 0 2 1 1 2 1 }  
 { 1 2 2 0 2 2 0 2 1 2 0 2 }  
 { 1 2 2 0 2 2 0 2 1 2 1 1 }  
 { 1 2 2 0 2 2 0 2 1 2 2 0 }  
 { 1 2 2 0 2 2 0 2 2 0 1 2 }  
 { 1 2 2 0 2 2 0 2 2 0 2 1 }  
 { 1 2 2 0 2 2 0 2 2 1 0 2 }  
 { 1 2 2 0 2 2 0 2 2 1 1 1 }  
 { 1 2 2 0 2 2 0 2 2 1 2 0 }  
 { 1 2 2 0 2 2 0 2 2 2 0 1 }

```

{ 1 2 2 0 2 2 0 2 2 2 1 0 }
{ 1 2 2 0 2 2 1 0 0 2 2 2 }
{ 1 2 2 0 2 2 1 0 1 1 2 2 }
{ 1 2 2 0 2 2 1 0 1 2 1 2 }
{ 1 2 2 0 2 2 1 0 1 2 2 1 }
{ 1 2 2 0 2 2 1 0 2 0 2 2 }
{ 1 2 2 0 2 2 1 0 2 1 1 2 }
{ 1 2 2 0 2 2 1 0 2 1 2 1 }
{ 1 2 2 0 2 2 1 0 2 2 0 2 }
{ 1 2 2 0 2 2 1 0 2 2 1 1 }
{ 1 2 2 0 2 2 1 0 2 2 2 0 }
{ 1 2 2 0 2 2 1 1 0 1 2 2 }
{ 1 2 2 0 2 2 1 1 0 2 1 2 }
{ 1 2 2 0 2 2 1 1 0 2 2 1 }
{ 1 2 2 0 2 2 1 1 1 0 2 2 }
{ 1 2 2 0 2 2 1 1 1 1 1 2 }
{ 1 2 2 0 2 2 1 1 1 1 2 1 }
{ 1 2 2 0 2 2 1 1 1 2 0 2 }
{ 1 2 2 0 2 2 1 1 1 2 1 1 }
{ 1 2 2 0 2 2 1 1 1 2 2 0 }
{ 1 2 2 0 2 2 1 1 2 0 1 2 }
{ 1 2 2 0 2 2 1 1 2 0 2 1 }
{ 1 2 2 0 2 2 1 1 2 1 0 2 }
{ 1 2 2 0 2 2 1 1 2 1 1 1 }
{ 1 2 2 0 2 2 1 1 2 1 2 0 }
{ 1 2 2 0 2 2 1 1 2 2 0 1 }
{ 1 2 2 0 2 2 1 1 2 2 1 0 }
{ 1 2 2 0 2 2 1 2 0 0 2 2 }
{ 1 2 2 0 2 2 1 2 0 1 1 2 }
{ 1 2 2 0 2 2 1 2 0 1 2 1 }
{ 1 2 2 0 2 2 1 2 0 2 0 2 }
{ 1 2 2 0 2 2 1 2 0 2 1 1 }
{ 1 2 2 0 2 2 1 2 0 2 2 0 }
{ 1 2 2 0 2 2 1 2 1 0 1 2 }
{ 1 2 2 0 2 2 1 2 1 0 2 1 }
{ 1 2 2 0 2 2 1 2 1 1 0 2 }
{ 1 2 2 0 2 2 1 2 1 1 1 1 }
{ 1 2 2 0 2 2 1 2 1 1 2 0 }
{ 1 2 2 0 2 2 1 2 1 2 0 1 }
{ 1 2 2 0 2 2 1 2 1 2 1 0 }
{ 1 2 2 0 2 2 1 2 2 0 0 2 }
{ 1 2 2 0 2 2 1 2 2 0 1 1 }

```



{ 1 2 2 0 2 2 1 2 2 0 2 0 }  
 { 1 2 2 0 2 2 1 2 2 1 0 1 }  
 { 1 2 2 0 2 2 1 2 2 1 1 0 }  
 { 1 2 2 0 2 2 1 2 2 2 0 0 }  
 { 1 2 2 0 2 2 2 0 0 1 2 2 }  
 { 1 2 2 0 2 2 2 0 0 2 1 2 }  
 { 1 2 2 0 2 2 2 0 0 2 2 1 }  
 { 1 2 2 0 2 2 2 0 1 0 2 2 }  
 { 1 2 2 0 2 2 2 0 1 1 1 2 }  
 { 1 2 2 0 2 2 2 0 1 1 2 1 }  
 { 1 2 2 0 2 2 2 0 1 2 0 2 }  
 { 1 2 2 0 2 2 2 0 1 2 1 1 }  
 { 1 2 2 0 2 2 2 0 1 2 2 0 }  
 { 1 2 2 0 2 2 2 0 2 0 1 2 }  
 { 1 2 2 0 2 2 2 0 2 0 2 1 }  
 { 1 2 2 0 2 2 2 0 2 1 0 2 }  
 { 1 2 2 0 2 2 2 0 2 1 1 1 }  
 { 1 2 2 0 2 2 2 0 2 1 2 0 }  
 { 1 2 2 0 2 2 2 0 2 2 0 1 }  
 { 1 2 2 0 2 2 2 0 2 2 1 0 }  
 { 1 2 2 0 2 2 2 1 0 0 2 2 }  
 { 1 2 2 0 2 2 2 1 0 1 1 2 }  
 { 1 2 2 0 2 2 2 1 0 1 2 1 }  
 { 1 2 2 0 2 2 2 1 0 2 0 2 }  
 { 1 2 2 0 2 2 2 1 0 2 1 1 }  
 { 1 2 2 0 2 2 2 1 0 2 2 0 }  
 { 1 2 2 0 2 2 2 1 1 0 1 2 }  
 { 1 2 2 0 2 2 2 1 1 0 2 1 }  
 { 1 2 2 0 2 2 2 1 1 1 0 2 }  
 { 1 2 2 0 2 2 2 1 1 1 1 1 }  
 { 1 2 2 0 2 2 2 1 1 1 2 0 }  
 { 1 2 2 0 2 2 2 1 1 2 0 1 }  
 { 1 2 2 0 2 2 2 1 1 2 1 0 }  
 { 1 2 2 0 2 2 2 1 2 0 0 2 }  
 { 1 2 2 0 2 2 2 1 2 0 1 1 }  
 { 1 2 2 0 2 2 2 1 2 0 2 0 }  
 { 1 2 2 0 2 2 2 1 2 1 0 1 }  
 { 1 2 2 0 2 2 2 1 2 1 1 0 }  
 { 1 2 2 0 2 2 2 1 2 2 0 0 }  
 { 1 2 2 0 2 2 2 2 0 0 1 2 }  
 { 1 2 2 0 2 2 2 2 0 0 2 1 }  
 { 1 2 2 0 2 2 2 2 0 1 0 2 }

{ 1 2 2 0 2 2 2 2 0 1 1 1 }  
 { 1 2 2 0 2 2 2 2 0 1 2 0 }  
 { 1 2 2 0 2 2 2 2 0 2 0 1 }  
 { 1 2 2 0 2 2 2 2 0 2 1 0 }  
 { 1 2 2 0 2 2 2 2 1 0 0 2 }  
 { 1 2 2 0 2 2 2 2 1 0 1 1 }  
 { 1 2 2 0 2 2 2 2 1 0 2 0 }  
 { 1 2 2 0 2 2 2 2 1 1 0 1 }  
 { 1 2 2 0 2 2 2 2 1 1 1 0 }  
 { 1 2 2 0 2 2 2 2 1 2 0 0 }  
 { 1 2 2 0 2 2 2 2 2 0 0 1 }  
 { 1 2 2 0 2 2 2 2 2 0 1 0 }  
 { 1 2 2 0 2 2 2 2 2 1 0 0 }  
 { 1 2 2 1 1 0 0 1 2 2 2 2 }  
 { 1 2 2 1 1 0 0 2 1 2 2 2 }  
 { 1 2 2 1 1 0 0 2 2 1 2 2 }  
 { 1 2 2 1 1 0 0 2 2 2 1 2 }  
 { 1 2 2 1 1 0 0 2 2 2 2 1 }  
 { 1 2 2 1 1 0 1 0 2 2 2 2 }  
 { 1 2 2 1 1 0 1 1 1 2 2 2 }  
 { 1 2 2 1 1 0 1 1 2 1 2 2 }  
 { 1 2 2 1 1 0 1 1 2 2 1 2 }  
 { 1 2 2 1 1 0 1 1 2 2 2 1 }  
 { 1 2 2 1 1 0 1 2 0 2 2 2 }  
 { 1 2 2 1 1 0 1 2 1 1 2 2 }  
 { 1 2 2 1 1 0 1 2 1 2 1 2 }  
 { 1 2 2 1 1 0 1 2 1 2 2 1 }  
 { 1 2 2 1 1 0 1 2 2 0 2 2 }  
 { 1 2 2 1 1 0 1 2 2 1 1 2 }  
 { 1 2 2 1 1 0 1 2 2 1 2 1 }  
 { 1 2 2 1 1 0 1 2 2 2 0 2 }  
 { 1 2 2 1 1 0 1 2 2 2 1 1 }  
 { 1 2 2 1 1 0 1 2 2 2 2 0 }  
 { 1 2 2 1 1 0 2 0 1 2 2 2 }  
 { 1 2 2 1 1 0 2 0 2 1 2 2 }  
 { 1 2 2 1 1 0 2 0 2 2 1 2 }  
 { 1 2 2 1 1 0 2 0 2 2 2 1 }  
 { 1 2 2 1 1 0 2 1 0 2 2 2 }  
 { 1 2 2 1 1 0 2 1 1 1 2 2 }  
 { 1 2 2 1 1 0 2 1 1 2 1 2 }  
 { 1 2 2 1 1 0 2 1 1 2 2 1 }  
 { 1 2 2 1 1 0 2 1 2 0 2 2 }

{ 1 2 2 1 1 0 2 1 2 1 1 2 }  
 { 1 2 2 1 1 0 2 1 2 1 2 1 }  
 { 1 2 2 1 1 0 2 1 2 2 0 2 }  
 { 1 2 2 1 1 0 2 1 2 2 1 1 }  
 { 1 2 2 1 1 0 2 1 2 2 2 0 }  
 { 1 2 2 1 1 0 2 2 0 1 2 2 }  
 { 1 2 2 1 1 0 2 2 0 2 1 2 }  
 { 1 2 2 1 1 0 2 2 0 2 2 1 }  
 { 1 2 2 1 1 0 2 2 1 0 2 2 }  
 { 1 2 2 1 1 0 2 2 1 1 1 2 }  
 { 1 2 2 1 1 0 2 2 1 1 2 1 }  
 { 1 2 2 1 1 0 2 2 1 2 0 2 }  
 { 1 2 2 1 1 0 2 2 1 2 1 1 }  
 { 1 2 2 1 1 0 2 2 1 2 2 0 }  
 { 1 2 2 1 1 0 2 2 2 0 1 2 }  
 { 1 2 2 1 1 0 2 2 2 0 2 1 }  
 { 1 2 2 1 1 0 2 2 2 1 0 2 }  
 { 1 2 2 1 1 0 2 2 2 1 1 1 }  
 { 1 2 2 1 1 0 2 2 2 1 2 0 }  
 { 1 2 2 1 1 0 2 2 2 2 0 1 }  
 { 1 2 2 1 1 0 2 2 2 2 1 0 }  
 { 1 2 2 1 1 1 0 0 2 2 2 2 }  
 { 1 2 2 1 1 1 0 1 1 2 2 2 }  
 { 1 2 2 1 1 1 0 1 2 1 2 2 }  
 { 1 2 2 1 1 1 0 1 2 2 1 2 }  
 { 1 2 2 1 1 1 0 1 2 2 2 1 }  
 { 1 2 2 1 1 1 0 2 0 2 2 2 }  
 { 1 2 2 1 1 1 0 2 1 1 2 2 }  
 { 1 2 2 1 1 1 0 2 1 2 1 2 }  
 { 1 2 2 1 1 1 0 2 1 2 2 1 }  
 { 1 2 2 1 1 1 0 2 2 0 2 2 }  
 { 1 2 2 1 1 1 0 2 2 1 1 2 }  
 { 1 2 2 1 1 1 0 2 2 1 2 1 }  
 { 1 2 2 1 1 1 0 2 2 2 0 2 }  
 { 1 2 2 1 1 1 0 2 2 2 1 1 }  
 { 1 2 2 1 1 1 0 2 2 2 2 0 }  
 { 1 2 2 1 1 1 1 0 1 2 2 2 }  
 { 1 2 2 1 1 1 1 0 2 1 2 2 }  
 { 1 2 2 1 1 1 1 0 2 2 1 2 }  
 { 1 2 2 1 1 1 1 0 2 2 2 1 }  
 { 1 2 2 1 1 1 1 1 0 2 2 2 }  
 { 1 2 2 1 1 1 1 1 1 1 2 2 }

{ 1 2 2 1 1 1 1 1 1 2 1 2 }  
 { 1 2 2 1 1 1 1 1 1 2 2 1 }  
 { 1 2 2 1 1 1 1 1 2 0 2 2 }  
 { 1 2 2 1 1 1 1 1 2 1 1 2 }  
 { 1 2 2 1 1 1 1 1 2 1 2 1 }  
 { 1 2 2 1 1 1 1 1 2 2 0 2 }  
 { 1 2 2 1 1 1 1 1 2 2 1 1 }  
 { 1 2 2 1 1 1 1 1 2 2 2 0 }  
 { 1 2 2 1 1 1 1 2 0 1 2 2 }  
 { 1 2 2 1 1 1 1 2 0 2 1 2 }  
 { 1 2 2 1 1 1 1 2 0 2 2 1 }  
 { 1 2 2 1 1 1 1 2 1 0 2 2 }  
 { 1 2 2 1 1 1 1 2 1 1 1 2 }  
 { 1 2 2 1 1 1 1 2 1 1 2 1 }  
 { 1 2 2 1 1 1 1 2 1 2 0 2 }  
 { 1 2 2 1 1 1 1 2 1 2 1 1 }  
 { 1 2 2 1 1 1 1 2 1 2 2 0 }  
 { 1 2 2 1 1 1 1 2 2 0 1 2 }  
 { 1 2 2 1 1 1 1 2 2 0 2 1 }  
 { 1 2 2 1 1 1 1 2 2 1 0 2 }  
 { 1 2 2 1 1 1 1 2 2 1 1 1 }  
 { 1 2 2 1 1 1 1 2 2 1 2 0 }  
 { 1 2 2 1 1 1 1 2 2 2 0 1 }  
 { 1 2 2 1 1 1 1 2 2 2 1 0 }  
 { 1 2 2 1 1 1 2 0 0 2 2 2 }  
 { 1 2 2 1 1 1 2 0 1 1 2 2 }  
 { 1 2 2 1 1 1 2 0 1 2 1 2 }  
 { 1 2 2 1 1 1 2 0 1 2 2 1 }  
 { 1 2 2 1 1 1 2 0 2 0 2 2 }  
 { 1 2 2 1 1 1 2 0 2 1 1 2 }  
 { 1 2 2 1 1 1 2 0 2 1 2 1 }  
 { 1 2 2 1 1 1 2 0 2 2 0 2 }  
 { 1 2 2 1 1 1 2 0 2 2 1 1 }  
 { 1 2 2 1 1 1 2 0 2 2 2 0 }  
 { 1 2 2 1 1 1 2 1 0 1 2 2 }  
 { 1 2 2 1 1 1 2 1 0 2 1 2 }  
 { 1 2 2 1 1 1 2 1 0 2 2 1 }  
 { 1 2 2 1 1 1 2 1 1 0 2 2 }  
 { 1 2 2 1 1 1 2 1 1 1 1 2 }  
 { 1 2 2 1 1 1 2 1 1 1 2 1 }  
 { 1 2 2 1 1 1 2 1 1 2 0 2 }  
 { 1 2 2 1 1 1 2 1 1 2 1 1 }

{ 1 2 2 1 1 1 2 1 1 2 2 0 }  
 { 1 2 2 1 1 1 2 1 2 0 1 2 }  
 { 1 2 2 1 1 1 2 1 2 0 2 1 }  
 { 1 2 2 1 1 1 2 1 2 1 0 2 }  
 { 1 2 2 1 1 1 2 1 2 1 1 1 }  
 { 1 2 2 1 1 1 2 1 2 1 2 0 }  
 { 1 2 2 1 1 1 2 1 2 2 0 1 }  
 { 1 2 2 1 1 1 2 1 2 2 1 0 }  
 { 1 2 2 1 1 1 2 2 0 0 2 2 }  
 { 1 2 2 1 1 1 2 2 0 1 1 2 }  
 { 1 2 2 1 1 1 2 2 0 1 2 1 }  
 { 1 2 2 1 1 1 2 2 0 2 0 2 }  
 { 1 2 2 1 1 1 2 2 0 2 1 1 }  
 { 1 2 2 1 1 1 2 2 0 2 2 0 }  
 { 1 2 2 1 1 1 2 2 1 0 1 2 }  
 { 1 2 2 1 1 1 2 2 1 0 2 1 }  
 { 1 2 2 1 1 1 2 2 1 1 0 2 }  
 { 1 2 2 1 1 1 2 2 1 1 1 1 }  
 { 1 2 2 1 1 1 2 2 1 1 2 0 }  
 { 1 2 2 1 1 1 2 2 1 2 0 1 }  
 { 1 2 2 1 1 1 2 2 1 2 1 0 }  
 { 1 2 2 1 1 1 2 2 2 0 0 2 }  
 { 1 2 2 1 1 1 2 2 2 0 1 1 }  
 { 1 2 2 1 1 1 2 2 2 0 2 0 }  
 { 1 2 2 1 1 1 2 2 2 1 0 1 }  
 { 1 2 2 1 1 1 2 2 2 1 1 0 }  
 { 1 2 2 1 1 1 2 2 2 2 0 0 }  
 { 1 2 2 1 1 2 0 0 1 2 2 2 }  
 { 1 2 2 1 1 2 0 0 2 1 2 2 }  
 { 1 2 2 1 1 2 0 0 2 2 1 2 }  
 { 1 2 2 1 1 2 0 0 2 2 2 1 }  
 { 1 2 2 1 1 2 0 1 0 2 2 2 }  
 { 1 2 2 1 1 2 0 1 1 1 2 2 }  
 { 1 2 2 1 1 2 0 1 1 2 1 2 }  
 { 1 2 2 1 1 2 0 1 1 2 2 1 }  
 { 1 2 2 1 1 2 0 1 2 0 2 2 }  
 { 1 2 2 1 1 2 0 1 2 1 1 2 }  
 { 1 2 2 1 1 2 0 1 2 1 2 1 }  
 { 1 2 2 1 1 2 0 1 2 2 0 2 }  
 { 1 2 2 1 1 2 0 1 2 2 1 1 }  
 { 1 2 2 1 1 2 0 1 2 2 2 0 }  
 { 1 2 2 1 1 2 0 2 0 1 2 2 }

{ 1 2 2 1 1 2 0 2 0 2 1 2 }  
 { 1 2 2 1 1 2 0 2 0 2 2 1 }  
 { 1 2 2 1 1 2 0 2 1 0 2 2 }  
 { 1 2 2 1 1 2 0 2 1 1 1 2 }  
 { 1 2 2 1 1 2 0 2 1 1 2 1 }  
 { 1 2 2 1 1 2 0 2 1 2 0 2 }  
 { 1 2 2 1 1 2 0 2 1 2 1 1 }  
 { 1 2 2 1 1 2 0 2 1 2 2 0 }  
 { 1 2 2 1 1 2 0 2 2 0 1 2 }  
 { 1 2 2 1 1 2 0 2 2 0 2 1 }  
 { 1 2 2 1 1 2 0 2 2 1 0 2 }  
 { 1 2 2 1 1 2 0 2 2 1 1 1 }  
 { 1 2 2 1 1 2 0 2 2 1 2 0 }  
 { 1 2 2 1 1 2 0 2 2 2 0 1 }  
 { 1 2 2 1 1 2 0 2 2 2 1 0 }  
 { 1 2 2 1 1 2 1 0 0 2 2 2 }  
 { 1 2 2 1 1 2 1 0 1 1 2 2 }  
 { 1 2 2 1 1 2 1 0 1 2 1 2 }  
 { 1 2 2 1 1 2 1 0 1 2 2 1 }  
 { 1 2 2 1 1 2 1 0 2 0 2 2 }  
 { 1 2 2 1 1 2 1 0 2 1 1 2 }  
 { 1 2 2 1 1 2 1 0 2 1 2 1 }  
 { 1 2 2 1 1 2 1 0 2 2 0 2 }  
 { 1 2 2 1 1 2 1 0 2 2 1 1 }  
 { 1 2 2 1 1 2 1 0 2 2 2 0 }  
 { 1 2 2 1 1 2 1 1 0 1 2 2 }  
 { 1 2 2 1 1 2 1 1 0 2 1 2 }  
 { 1 2 2 1 1 2 1 1 0 2 2 1 }  
 { 1 2 2 1 1 2 1 1 1 0 2 2 }  
 { 1 2 2 1 1 2 1 1 1 1 1 2 }  
 { 1 2 2 1 1 2 1 1 1 1 2 1 }  
 { 1 2 2 1 1 2 1 1 1 2 0 2 }  
 { 1 2 2 1 1 2 1 1 1 2 1 1 }  
 { 1 2 2 1 1 2 1 1 1 2 2 0 }  
 { 1 2 2 1 1 2 1 1 2 0 1 2 }  
 { 1 2 2 1 1 2 1 1 2 0 2 1 }  
 { 1 2 2 1 1 2 1 1 2 1 0 2 }  
 { 1 2 2 1 1 2 1 1 2 1 1 1 }  
 { 1 2 2 1 1 2 1 1 2 1 2 0 }  
 { 1 2 2 1 1 2 1 1 2 2 0 1 }  
 { 1 2 2 1 1 2 1 1 2 2 1 0 }  
 { 1 2 2 1 1 2 1 2 0 0 2 2 }

{ 1 2 2 1 1 2 1 2 0 1 1 2 }  
 { 1 2 2 1 1 2 1 2 0 1 2 1 }  
 { 1 2 2 1 1 2 1 2 0 2 0 2 }  
 { 1 2 2 1 1 2 1 2 0 2 1 1 }  
 { 1 2 2 1 1 2 1 2 0 2 2 0 }  
 { 1 2 2 1 1 2 1 2 1 0 1 2 }  
 { 1 2 2 1 1 2 1 2 1 0 2 1 }  
 { 1 2 2 1 1 2 1 2 1 1 0 2 }  
 { 1 2 2 1 1 2 1 2 1 1 1 1 }  
 { 1 2 2 1 1 2 1 2 1 1 2 0 }  
 { 1 2 2 1 1 2 1 2 1 2 0 1 }  
 { 1 2 2 1 1 2 1 2 1 2 1 0 }  
 { 1 2 2 1 1 2 1 2 2 0 0 2 }  
 { 1 2 2 1 1 2 1 2 2 0 1 1 }  
 { 1 2 2 1 1 2 1 2 2 0 2 0 }  
 { 1 2 2 1 1 2 1 2 2 1 0 1 }  
 { 1 2 2 1 1 2 1 2 2 1 1 0 }  
 { 1 2 2 1 1 2 1 2 2 2 0 0 }  
 { 1 2 2 1 1 2 2 0 0 1 2 2 }  
 { 1 2 2 1 1 2 2 0 0 2 1 2 }  
 { 1 2 2 1 1 2 2 0 0 2 2 1 }  
 { 1 2 2 1 1 2 2 0 1 0 2 2 }  
 { 1 2 2 1 1 2 2 0 1 1 1 2 }  
 { 1 2 2 1 1 2 2 0 1 1 2 1 }  
 { 1 2 2 1 1 2 2 0 1 2 0 2 }  
 { 1 2 2 1 1 2 2 0 1 2 1 1 }  
 { 1 2 2 1 1 2 2 0 1 2 2 0 }  
 { 1 2 2 1 1 2 2 0 2 0 1 2 }  
 { 1 2 2 1 1 2 2 0 2 0 2 1 }  
 { 1 2 2 1 1 2 2 0 2 1 0 2 }  
 { 1 2 2 1 1 2 2 0 2 1 1 1 }  
 { 1 2 2 1 1 2 2 0 2 1 2 0 }  
 { 1 2 2 1 1 2 2 0 2 2 0 1 }  
 { 1 2 2 1 1 2 2 0 2 2 1 0 }  
 { 1 2 2 1 1 2 2 1 0 0 2 2 }  
 { 1 2 2 1 1 2 2 1 0 1 1 2 }  
 { 1 2 2 1 1 2 2 1 0 1 2 1 }  
 { 1 2 2 1 1 2 2 1 0 2 0 2 }  
 { 1 2 2 1 1 2 2 1 0 2 1 1 }  
 { 1 2 2 1 1 2 2 1 0 2 2 0 }  
 { 1 2 2 1 1 2 2 1 1 0 1 2 }  
 { 1 2 2 1 1 2 2 1 1 0 2 1 }

{ 1 2 2 1 1 2 2 1 1 1 0 2 }  
 { 1 2 2 1 1 2 2 1 1 1 1 1 }  
 { 1 2 2 1 1 2 2 1 1 1 2 0 }  
 { 1 2 2 1 1 2 2 1 1 2 0 1 }  
 { 1 2 2 1 1 2 2 1 1 2 1 0 }  
 { 1 2 2 1 1 2 2 1 2 0 0 2 }  
 { 1 2 2 1 1 2 2 1 2 0 1 1 }  
 { 1 2 2 1 1 2 2 1 2 0 2 0 }  
 { 1 2 2 1 1 2 2 1 2 1 0 1 }  
 { 1 2 2 1 1 2 2 1 2 1 1 0 }  
 { 1 2 2 1 1 2 2 1 2 2 0 0 }  
 { 1 2 2 1 1 2 2 2 0 0 1 2 }  
 { 1 2 2 1 1 2 2 2 0 0 2 1 }  
 { 1 2 2 1 1 2 2 2 0 1 0 2 }  
 { 1 2 2 1 1 2 2 2 0 1 1 1 }  
 { 1 2 2 1 1 2 2 2 0 1 2 0 }  
 { 1 2 2 1 1 2 2 2 0 2 0 1 }  
 { 1 2 2 1 1 2 2 2 0 2 1 0 }  
 { 1 2 2 1 1 2 2 2 1 0 0 2 }  
 { 1 2 2 1 1 2 2 2 1 0 1 1 }  
 { 1 2 2 1 1 2 2 2 1 0 2 0 }  
 { 1 2 2 1 1 2 2 2 1 1 0 1 }  
 { 1 2 2 1 1 2 2 2 1 1 1 0 }  
 { 1 2 2 1 1 2 2 2 1 2 0 0 }  
 { 1 2 2 1 1 2 2 2 2 0 0 1 }  
 { 1 2 2 1 1 2 2 2 2 0 1 0 }  
 { 1 2 2 1 1 2 2 2 2 1 0 0 }  
 { 1 2 2 1 2 0 0 0 2 2 2 2 }  
 { 1 2 2 1 2 0 0 1 1 2 2 2 }  
 { 1 2 2 1 2 0 0 1 2 1 2 2 }  
 { 1 2 2 1 2 0 0 1 2 2 1 2 }  
 { 1 2 2 1 2 0 0 1 2 2 2 1 }  
 { 1 2 2 1 2 0 0 2 0 2 2 2 }  
 { 1 2 2 1 2 0 0 2 1 1 2 2 }  
 { 1 2 2 1 2 0 0 2 1 2 1 2 }  
 { 1 2 2 1 2 0 0 2 1 2 2 1 }  
 { 1 2 2 1 2 0 0 2 2 0 2 2 }  
 { 1 2 2 1 2 0 0 2 2 1 1 2 }  
 { 1 2 2 1 2 0 0 2 2 1 2 1 }  
 { 1 2 2 1 2 0 0 2 2 2 0 2 }  
 { 1 2 2 1 2 0 0 2 2 2 1 1 }  
 { 1 2 2 1 2 0 0 2 2 2 2 0 }



{ 1 2 2 1 2 0 1 0 1 2 2 2 }  
 { 1 2 2 1 2 0 1 0 2 1 2 2 }  
 { 1 2 2 1 2 0 1 0 2 2 1 2 }  
 { 1 2 2 1 2 0 1 0 2 2 2 1 }  
 { 1 2 2 1 2 0 1 1 0 2 2 2 }  
 { 1 2 2 1 2 0 1 1 1 1 2 2 }  
 { 1 2 2 1 2 0 1 1 1 2 1 2 }  
 { 1 2 2 1 2 0 1 1 1 2 2 1 }  
 { 1 2 2 1 2 0 1 1 2 0 2 2 }  
 { 1 2 2 1 2 0 1 1 2 1 1 2 }  
 { 1 2 2 1 2 0 1 1 2 1 2 1 }  
 { 1 2 2 1 2 0 1 1 2 2 0 2 }  
 { 1 2 2 1 2 0 1 1 2 2 1 1 }  
 { 1 2 2 1 2 0 1 1 2 2 2 0 }  
 { 1 2 2 1 2 0 1 2 0 1 2 2 }  
 { 1 2 2 1 2 0 1 2 0 2 1 2 }  
 { 1 2 2 1 2 0 1 2 0 2 2 1 }  
 { 1 2 2 1 2 0 1 2 1 0 2 2 }  
 { 1 2 2 1 2 0 1 2 1 1 1 2 }  
 { 1 2 2 1 2 0 1 2 1 1 2 1 }  
 { 1 2 2 1 2 0 1 2 1 2 0 2 }  
 { 1 2 2 1 2 0 1 2 1 2 1 1 }  
 { 1 2 2 1 2 0 1 2 1 2 2 0 }  
 { 1 2 2 1 2 0 1 2 2 0 1 2 }  
 { 1 2 2 1 2 0 1 2 2 0 2 1 }  
 { 1 2 2 1 2 0 1 2 2 1 0 2 }  
 { 1 2 2 1 2 0 1 2 2 1 1 1 }  
 { 1 2 2 1 2 0 1 2 2 1 2 0 }  
 { 1 2 2 1 2 0 1 2 2 2 0 1 }  
 { 1 2 2 1 2 0 1 2 2 2 1 0 }  
 { 1 2 2 1 2 0 2 0 0 2 2 2 }  
 { 1 2 2 1 2 0 2 0 1 1 2 2 }  
 { 1 2 2 1 2 0 2 0 1 2 1 2 }  
 { 1 2 2 1 2 0 2 0 1 2 2 1 }  
 { 1 2 2 1 2 0 2 0 2 0 2 2 }  
 { 1 2 2 1 2 0 2 0 2 1 1 2 }  
 { 1 2 2 1 2 0 2 0 2 1 2 1 }  
 { 1 2 2 1 2 0 2 0 2 2 0 2 }  
 { 1 2 2 1 2 0 2 0 2 2 1 1 }  
 { 1 2 2 1 2 0 2 0 2 2 2 0 }  
 { 1 2 2 1 2 0 2 1 0 1 2 2 }  
 { 1 2 2 1 2 0 2 1 0 2 1 2 }

```

{ 1 2 2 1 2 0 2 1 0 2 2 1 }
{ 1 2 2 1 2 0 2 1 1 0 2 2 }
{ 1 2 2 1 2 0 2 1 1 1 1 2 }
{ 1 2 2 1 2 0 2 1 1 1 2 1 }
{ 1 2 2 1 2 0 2 1 1 2 0 2 }
{ 1 2 2 1 2 0 2 1 1 2 1 1 }
{ 1 2 2 1 2 0 2 1 1 2 2 0 }
{ 1 2 2 1 2 0 2 1 2 0 1 2 }
{ 1 2 2 1 2 0 2 1 2 0 2 1 }
{ 1 2 2 1 2 0 2 1 2 1 0 2 }
{ 1 2 2 1 2 0 2 1 2 1 1 1 }
{ 1 2 2 1 2 0 2 1 2 1 2 0 }
{ 1 2 2 1 2 0 2 1 2 2 0 1 }
{ 1 2 2 1 2 0 2 1 2 2 1 0 }
{ 1 2 2 1 2 0 2 2 0 0 2 2 }
{ 1 2 2 1 2 0 2 2 0 1 1 2 }
{ 1 2 2 1 2 0 2 2 0 1 2 1 }
{ 1 2 2 1 2 0 2 2 0 2 0 2 }
{ 1 2 2 1 2 0 2 2 0 2 1 1 }
{ 1 2 2 1 2 0 2 2 0 2 2 0 }
{ 1 2 2 1 2 0 2 2 1 0 1 2 }
{ 1 2 2 1 2 0 2 2 1 0 2 1 }
{ 1 2 2 1 2 0 2 2 1 1 0 2 }
{ 1 2 2 1 2 0 2 2 1 1 1 1 }
{ 1 2 2 1 2 0 2 2 1 1 2 0 }
{ 1 2 2 1 2 0 2 2 1 2 0 1 }
{ 1 2 2 1 2 0 2 2 1 2 1 0 }
{ 1 2 2 1 2 0 2 2 2 0 0 2 }
{ 1 2 2 1 2 0 2 2 2 0 1 1 }
{ 1 2 2 1 2 0 2 2 2 0 2 0 }
{ 1 2 2 1 2 0 2 2 2 1 0 1 }
{ 1 2 2 1 2 0 2 2 2 1 1 0 }
{ 1 2 2 1 2 0 2 2 2 2 0 0 }
...
...
end
end

```

## 8 XYZ coordinates

### 8.1 CoPc

|   |                   |                   |                   |
|---|-------------------|-------------------|-------------------|
| N | 1.90760400764616  | -0.00013656199226 | -0.00006078140000 |
| N | 2.37327899511037  | -2.37340454052613 | -0.00002311500417 |
| N | -0.00005448179457 | -1.90784908863108 | -0.00006338972785 |
| N | -2.37334972611391 | -2.37351245114297 | -0.00001159797819 |
| N | -1.90769322703267 | -0.00028825476972 | -0.00002430164273 |
| N | -2.37336280938339 | 2.37301750644065  | 0.00000349805046  |
| N | -0.00004679589146 | 1.90746520627512  | -0.00007265410691 |
| N | 2.37325359321621  | 2.37307470388284  | -0.00005685135157 |
| C | 2.73025697496674  | 1.10710001839777  | -0.00004463978221 |
| C | 2.73030490058675  | -1.10745665424054 | -0.00001299884476 |
| C | 1.10730285198220  | -2.73050476687278 | -0.00005472446884 |
| C | -1.10728950828299 | -2.73047697466832 | -0.00003388779446 |
| C | -2.73037184377130 | -1.10753806465781 | -0.00000315224592 |
| C | -2.73036551308103 | 1.10703971689051  | 0.00002049219616  |
| C | -1.10738698685306 | 2.73015163305733  | -0.00004073606805 |
| C | 1.10721245908342  | 2.73007080459115  | -0.00006539031563 |
| C | 4.13063153556912  | 0.69723471469717  | 0.00002633814809  |
| C | 4.13060786908568  | -0.69760499185474 | 0.00005031805467  |
| C | 0.69748220591619  | -4.13074503250404 | -0.00006666501682 |
| C | -0.69736679394799 | -4.13079191127717 | -0.00004905931049 |
| C | -4.13068549908172 | -0.69767604742426 | 0.00006195023848  |
| C | -4.13068427590127 | 0.69717075838994  | 0.00009017254767  |
| C | -0.69746809295615 | 4.13042000585655  | -0.00006187829815 |
| C | 0.69738232172578  | 4.13039019108694  | -0.00007924829235 |
| C | 5.31475662769833  | 1.41864392123955  | 0.00008580934859  |
| C | 6.50854199048662  | 0.69865003950611  | 0.00017220467436  |
| C | 6.50850838074998  | -0.69913794089740 | 0.00018943249223  |
| C | 5.31470478779604  | -1.41908790302745 | 0.00012539077919  |
| C | 1.41895284189239  | -5.31484656643585 | -0.00008138576725 |
| C | 0.69899524711639  | -6.50864548919934 | -0.00011639566893 |
| C | -0.69880774549123 | -6.50868356851814 | -0.00012904368574 |
| C | -1.41880330689617 | -5.31489185626583 | -0.00009412777373 |
| C | -5.31481741016186 | -1.41910330417167 | 0.00010422712717  |
| C | -6.50860475035784 | -0.69911621618054 | 0.00014881611942  |
| C | -6.50859329623017 | 0.69867550002716  | 0.00015653830556  |
| C | -5.31478929415402 | 1.41863855036220  | 0.00011524827758  |
| C | -1.41883965141135 | 5.31459991634637  | -0.00005883522242 |
| C | -0.69878588584800 | 6.50834290730459  | -0.00009738305575 |
| C | 0.69901898565033  | 6.50828034182167  | -0.00013213262874 |

|    |                   |                   |                   |
|----|-------------------|-------------------|-------------------|
| C  | 1.41892538306042  | 5.31443671323007  | -0.00010932107293 |
| H  | 5.30762664128829  | 2.50048185131818  | 0.00008109707455  |
| H  | 5.30754092922293  | -2.50092043445590 | 0.00015264203877  |
| H  | 2.50078371300951  | -5.30769769869652 | -0.00008664509391 |
| H  | -2.50063381067410 | -5.30773675447106 | -0.00008769138317 |
| H  | -5.30768280358761 | -2.50093409729705 | 0.00008785007962  |
| H  | -5.30761051912615 | 2.50046746236544  | 0.00014080208064  |
| H  | -2.50067182053003 | 5.30752815844390  | -0.00003869906798 |
| H  | 2.50075678531225  | 5.30718360852486  | -0.00013044242140 |
| H  | 7.45210839344797  | 1.22969547811653  | 0.00022600011942  |
| H  | 7.45204949179915  | -1.23023516559752 | 0.00026374911052  |
| H  | 1.23008427651020  | -7.45219132146213 | -0.00014750045762 |
| H  | -1.22985965357285 | -7.45225064809487 | -0.00014657347360 |
| H  | -7.45216427036442 | -1.23017520016851 | 0.00017457032741  |
| H  | -7.45214487146489 | 1.22975311319566  | 0.00020245065418  |
| H  | -1.22980615465101 | 7.45192705518792  | -0.00011305407526 |
| H  | 1.23014113696887  | 7.45180744473419  | -0.00015988450815 |
| Co | -0.00007252828518 | -0.00019381578875 | -0.00012541083898 |

## 8.2 FePc

|   |                   |                   |                   |
|---|-------------------|-------------------|-------------------|
| N | 1.94675930319691  | 0.00038080075122  | -0.00043895923883 |
| N | 2.37779559221143  | -2.37798899581087 | -0.00030370938076 |
| N | -0.00049880361469 | -1.94707567307003 | -0.00042309067084 |
| N | -2.37664278677916 | -2.37694014272182 | -0.00026334876121 |
| N | -1.94679179667339 | -0.00077103187266 | -0.00041775969253 |
| N | -2.37782353665591 | 2.37760525341211  | -0.00027953298314 |
| N | 0.00047025822109  | 1.94670676965312  | -0.00042414802720 |
| N | 2.37660438612261  | 2.37654984565071  | -0.00026645269314 |
| C | 2.75246424199604  | 1.11271209542245  | -0.00032400906072 |
| C | 2.75394443754487  | -1.11430995403065 | -0.00032932765938 |
| C | 1.11418461517259  | -2.75429855233004 | -0.00033451358675 |
| C | -1.11280031510402 | -2.75280746229680 | -0.00029087581081 |
| C | -2.75252143119075 | -1.11310338753599 | -0.00031247027121 |
| C | -2.75396440818147 | 1.11392519998125  | -0.00029830766715 |
| C | -1.11421709766337 | 2.75392058396862  | -0.00032659174286 |
| C | 1.11277918816089  | 2.75244004520974  | -0.00029020156432 |
| C | 4.14653941033955  | 0.69863298399871  | -0.00011758693264 |
| C | 4.14645012940469  | -0.70223874336906 | -0.00013927774573 |
| C | 0.70215372453563  | -4.14682025104444 | -0.00013763703790 |
| C | -0.69872976761546 | -4.14691577392334 | -0.00011523695788 |
| C | -4.14653626240210 | -0.69902195412293 | -0.00013004571559 |

|    |                   |                   |                   |
|----|-------------------|-------------------|-------------------|
| C  | -4.14649546024451 | 0.70184782844038  | -0.00010941937679 |
| C  | -0.70215208259611 | 4.14646084575735  | -0.00013336361380 |
| C  | 0.69872536468819  | 4.14652005379882  | -0.00012972186979 |
| C  | 5.33793658961799  | 1.41705781618286  | 0.00012326931358  |
| C  | 6.52484725802694  | 0.69712896945764  | 0.00028923816977  |
| C  | 6.52477946996587  | -0.70659107063644 | 0.00025060789466  |
| C  | 5.33681015677643  | -1.42374176960539 | 0.00003653867936  |
| C  | 1.42357310094969  | -5.33726142029200 | 0.00006116950425  |
| C  | 0.70635340801399  | -6.52518639195252 | 0.00026184180933  |
| C  | -0.69737482154099 | -6.52524529943025 | 0.00028091977727  |
| C  | -1.41723539146686 | -5.33826207238707 | 0.00010136506830  |
| C  | -5.33790540567545 | -1.41749966097557 | 0.00008271810580  |
| C  | -6.52484925314067 | -0.69762131710430 | 0.00026703294923  |
| C  | -6.52483135200696 | 0.70610266138825  | 0.00025892199020  |
| C  | -5.33689331675129 | 1.42329915746670  | 0.00007363178023  |
| C  | -1.42352351614197 | 5.33693781803323  | 0.00006183815473  |
| C  | -0.70627066567950 | 6.52482499639409  | 0.00024676026168  |
| C  | 0.69745241099528  | 6.52484106537977  | 0.00026803301216  |
| C  | 1.41726856218086  | 5.33784255602610  | 0.00008500753736  |
| H  | 5.33271973320394  | 2.49893181375720  | 0.00014596072185  |
| H  | 5.32871105459239  | -2.50561231518257 | 0.00003553054890  |
| H  | 2.50544401616776  | -5.32927863489223 | 0.00005022892286  |
| H  | -2.49909943720310 | -5.33292449667697 | 0.00013457671293  |
| H  | -5.33262844475115 | -2.49936963693981 | 0.00008137978811  |
| H  | -5.32885591818423 | 2.50517007029015  | 0.00010116841015  |
| H  | -2.50539504694048 | 5.32901694043139  | 0.00006283989166  |
| H  | 2.49913217724629  | 5.33246248105765  | 0.00011310995963  |
| H  | 7.47013997729430  | 1.22534608656610  | 0.00048218598043  |
| H  | 7.46953184246570  | -1.23558551023121 | 0.00042068739535  |
| H  | 1.23532308220156  | -7.46995200970030 | 0.00041594053531  |
| H  | -1.22563259663811 | -7.47051587863805 | 0.00046778635690  |
| H  | -7.47012028879009 | -1.22587860318798 | 0.00042617929873  |
| H  | -7.46960816900623 | 1.23505308106409  | 0.00043097867598  |
| H  | -1.23520533970540 | 7.46960822613967  | 0.00040637846172  |
| H  | 1.22574185135611  | 7.47009395225740  | 0.00043676469318  |
| Fe | -0.00003263030626 | -0.00018798797547 | -0.00062500230057 |

### 8.3 MnPc

|   |                  |                   |                  |
|---|------------------|-------------------|------------------|
| N | 1.94885290431288 | -0.00013770397919 | 0.00030956236231 |
| N | 2.38780640354127 | -2.37744574139792 | 0.00022051156257 |
| N | 0.00005648420359 | -1.96215017176507 | 0.00037821069778 |

|   |                   |                   |                   |
|---|-------------------|-------------------|-------------------|
| N | -2.38770231460935 | -2.37752410533222 | 0.00022332299341  |
| N | -1.94888054890581 | -0.00022485350644 | 0.00036430270295  |
| N | -2.38784604848528 | 2.37708145598923  | 0.00023476198920  |
| N | -0.00010186479127 | 1.96178461592909  | 0.00035221940701  |
| N | 2.38767736518723  | 2.37713617385777  | 0.00015404917376  |
| C | 2.76235336341250  | 1.12184431205517  | 0.00017617302178  |
| C | 2.76241487691730  | -1.12212257960997 | 0.00021995122377  |
| C | 1.12023506927749  | -2.76566733042193 | 0.00026618372391  |
| C | -1.12007431235246 | -2.76562294787354 | 0.00026274723336  |
| C | -2.76236294961763 | -1.12222640636679 | 0.00024841986688  |
| C | -2.76245940509173 | 1.12175887169900  | 0.00025121030343  |
| C | -1.12027461120560 | 2.76531646642832  | 0.00026444070855  |
| C | 1.12004284838330  | 2.76522455245828  | 0.00021973881715  |
| C | 4.15697343097844  | 0.69939143713648  | 0.00001800838789  |
| C | 4.15696903807769  | -0.69955655489039 | 0.00005197218162  |
| C | 0.70341509031201  | -4.14672432811008 | 0.00015384400760  |
| C | -0.70337708047609 | -4.14673395646832 | 0.00015314405596  |
| C | -4.15698000850561 | -0.69977716757416 | 0.00007752849370  |
| C | -4.15699616121263 | 0.69917480592808  | 0.00008632365081  |
| C | -0.70343011431184 | 4.14635679295502  | 0.00015651215890  |
| C | 0.70336633833194  | 4.14633490064705  | 0.00013721447025  |
| C | 5.34585194315615  | 1.41876323409019  | -0.00018213315105 |
| C | 6.53615393082941  | 0.70035403920185  | -0.00030994048730 |
| C | 6.53613757539471  | -0.70053750164261 | -0.00025614715179 |
| C | 5.34583336912932  | -1.41893208093276 | -0.00009375539420 |
| C | 1.42194449293582  | -5.34368635493051 | -0.00000450758058 |
| C | 0.70402092686346  | -6.52660361995509 | -0.00014216104520 |
| C | -0.70433467578411 | -6.52658776493423 | -0.00014213893055 |
| C | -1.42210358810677 | -5.34356136692100 | -0.00000004603614 |
| C | -5.34581743216974 | -1.41920516050610 | -0.00013148392944 |
| C | -6.53614750115444 | -0.70084862853474 | -0.00032562068794 |
| C | -6.53617504746199 | 0.70003890540354  | -0.00031234652571 |
| C | -5.34590054621605 | 1.41848186342580  | -0.00011362060238 |
| C | -1.42190887254341 | 5.34335446306405  | 0.00003380194248  |
| C | -0.70393715557882 | 6.52624168777465  | -0.00011288508577 |
| C | 0.70441642789170  | 6.52617552155803  | -0.00012826484443 |
| C | 1.42213878803907  | 5.34312487365252  | -0.00001962442265 |
| H | 5.33881815158168  | 2.50063722278337  | -0.00021760850122 |
| H | 5.33873101216119  | -2.50080291289221 | -0.00006608303681 |
| H | 2.50379651943813  | -5.33799445526684 | -0.00000505850047 |
| H | -2.50395281613874 | -5.33765281285098 | -0.00000835957852 |
| H | -5.33874219541903 | -2.50108080963917 | -0.00014922427475 |

|    |                   |                   |                   |
|----|-------------------|-------------------|-------------------|
| H  | -5.33890545368547 | 2.50035628955877  | -0.00012195385936 |
| H  | -2.50376038833766 | 5.33773033350272  | 0.00003705022477  |
| H  | 2.50398686404755  | 5.33715714629356  | -0.00004398579469 |
| H  | 7.48025405147707  | 1.23054334194374  | -0.00044940200469 |
| H  | 7.48022615455029  | -1.23075047319436 | -0.00037081880284 |
| H  | 1.23109080769132  | -7.47250812491849 | -0.00026004930498 |
| H  | -1.23145143757097 | -7.47246640317011 | -0.00026023429329 |
| H  | -7.48022667966855 | -1.23107229651628 | -0.00049294108265 |
| H  | -7.48027760010111 | 1.23022392248919  | -0.00047954159109 |
| H  | -1.23097130090558 | 7.47216515481220  | -0.00020332736008 |
| H  | 1.23157092417368  | 7.47203260118240  | -0.00024659168833 |
| Mn | -0.00003704188853 | -0.00016637171853 | 0.00059865018714  |

#### 8.4 CoPcF16

|   |                   |                   |                   |
|---|-------------------|-------------------|-------------------|
| N | 1.92841505816256  | -0.00030279957971 | -0.16638642313408 |
| N | 2.36868406088132  | -2.38448739916422 | -0.13204946960590 |
| N | 0.00001217525767  | -1.91328070311633 | -0.16370690369063 |
| N | -2.36863754290399 | -2.38436959499222 | -0.13193133381107 |
| N | -1.92843674022866 | -0.00015743309321 | -0.16629983273148 |
| N | -2.36868626165874 | 2.38405424140041  | -0.13199788887337 |
| N | -0.00004179392645 | 1.91283635878504  | -0.16376010918178 |
| N | 2.36861102574798  | 2.38390703109109  | -0.13194273319341 |
| C | 2.73727356330004  | 1.10642703716175  | -0.13680662388353 |
| C | 2.73733044570195  | -1.10700963510001 | -0.13645803061048 |
| C | 1.11554382642851  | -2.73142283621758 | -0.13711184159599 |
| C | -1.11551751654463 | -2.73134756719060 | -0.13666331918158 |
| C | -2.73730612037416 | -1.10689101029515 | -0.13677913011717 |
| C | -2.73731402705962 | 1.10657011290545  | -0.13637893141192 |
| C | -1.11554940730986 | 2.73099760233623  | -0.13711512607899 |
| C | 1.11549901683810  | 2.73088745232912  | -0.13669215089226 |
| C | 4.12533740258543  | 0.70272315325002  | -0.07878775485604 |
| C | 4.12545787338931  | -0.70319893673017 | -0.07909362380265 |
| C | 0.69915148809078  | -4.13383698826185 | -0.08392955899863 |
| C | -0.69914119947022 | -4.13384965185734 | -0.08423540876741 |
| C | -4.12536330250366 | -0.70314529999502 | -0.07874347792804 |
| C | -4.12543967068509 | 0.70278449964731  | -0.07904558280345 |
| C | -0.69913466136344 | 4.13340334481943  | -0.08397296227466 |
| C | 0.69915854673446  | 4.13340046180889  | -0.08423573292117 |
| C | 5.31483135128159  | 1.40825234106195  | 0.01673142538901  |
| C | 6.50620010370781  | 0.69788324325260  | 0.12712992128371  |
| C | 6.50631000911183  | -0.69803578755652 | 0.12701336024375  |

|    |                   |                   |                   |
|----|-------------------|-------------------|-------------------|
| C  | 5.31503571938691  | -1.40856644083460 | 0.01656426336306  |
| C  | 1.40631252479636  | -5.31640311881151 | 0.00842506302114  |
| C  | 0.69503190506378  | -6.51386113590278 | 0.11643059595107  |
| C  | -0.69511650269095 | -6.51381388707565 | 0.11650173279608  |
| C  | -1.40635119193181 | -5.31631142624570 | 0.00852137364961  |
| C  | -5.31490825222710 | -1.40860493021171 | 0.01669764841111  |
| C  | -6.50624621649807 | -0.69818114791056 | 0.12708601776568  |
| C  | -6.50629309270645 | 0.69773563398395  | 0.12704532456178  |
| C  | -5.31498218399754 | 1.40820608230817  | 0.01662074702296  |
| C  | -1.40628688292659 | 5.31598041743527  | 0.00833665778161  |
| C  | -0.69499556006085 | 6.51342889377372  | 0.11638082459996  |
| C  | 0.69515360795221  | 6.51336167908851  | 0.11656514549938  |
| C  | 1.40637922142202  | 5.31584995794296  | 0.00861244699456  |
| F  | 5.36230839309944  | 2.73750960585600  | 0.02110401298845  |
| F  | 5.36269984594574  | -2.73781845557393 | 0.02067661333642  |
| F  | 2.73422893142659  | -5.36587284128574 | 0.01331710604933  |
| F  | -2.73426733323479 | -5.36572660312016 | 0.01343601997204  |
| F  | -5.36248851705732 | -2.73786339770833 | 0.02097173549481  |
| F  | -5.36257796293413 | 2.73746276837679  | 0.02080802837190  |
| F  | -2.73420280513160 | 5.36547603742521  | 0.01311972696537  |
| F  | 2.73429558132762  | 5.36525001932908  | 0.01362480856722  |
| F  | 7.66338721569730  | 1.35105967782632  | 0.24476272359334  |
| F  | 7.66358511082836  | -1.35107422831948 | 0.24450088244608  |
| F  | 1.35240266216110  | -7.66741349652608 | 0.23117695226573  |
| F  | -1.35254577763371 | -7.66732613417762 | 0.23128283869641  |
| F  | -7.66346037053662 | -1.35131966831426 | 0.24467065531844  |
| F  | -7.66353272317084 | 1.35082643122289  | 0.24456637475449  |
| F  | -1.35235289697330 | 7.66700021292111  | 0.23105925789399  |
| F  | 1.35258643074855  | 7.66686553414996  | 0.23140854074002  |
| Co | -0.00004658333515 | -0.00023327632114 | -0.18102487544278 |

## 8.5 FePcF16

|    |                   |                   |                   |
|----|-------------------|-------------------|-------------------|
| Fe | -0.00000099904389 | -0.00020223675671 | 0.00017369783134  |
| N  | 1.94391242117970  | -0.00330965207958 | -0.00017602159177 |
| N  | 2.39667186952585  | -2.39687551238573 | -0.00032884287411 |
| N  | 0.00310607681533  | -1.94411593735907 | -0.00017646164220 |
| N  | -2.39000073773558 | -2.39020263565171 | 0.00004337767127  |
| N  | -1.94391311433227 | 0.00290386589616  | 0.00035067476551  |
| N  | -2.39667077556495 | 2.39646778313845  | 0.00042188885390  |
| N  | -0.00310693124608 | 1.94370962254697  | 0.00035072340908  |
| N  | 2.38999919074555  | 2.38979652530156  | 0.00004393080286  |



|   |                   |                   |                   |
|---|-------------------|-------------------|-------------------|
| C | 2.76236772044550  | 1.12007032694080  | 0.00003966420687  |
| C | 2.76644850528798  | -1.12581928572822 | -0.00026233752985 |
| C | 1.12561561404412  | -2.76665241663621 | -0.00026299109428 |
| C | -1.12027407472486 | -2.76257113539207 | 0.00003872175438  |
| C | -2.76236733801797 | -1.12047529759790 | 0.00006675901819  |
| C | -2.76644957504488 | 1.12541412855581  | 0.00037270998730  |
| C | -1.12561699930510 | 2.76624602294144  | 0.00037233830327  |
| C | 1.12027235455829  | 2.76216351801817  | 0.00006667789737  |
| C | 4.16319092383346  | 0.70716183662350  | 0.00010624074167  |
| C | 4.16462179505192  | -0.71320282851445 | -0.00012941203991 |
| C | 0.71299888214132  | -4.16482556799938 | -0.00013100542857 |
| C | -0.70736605507465 | -4.16339448021233 | 0.00010441864325  |
| C | -4.16319061835931 | -0.70756757638470 | -0.00006448822524 |
| C | -4.16462161134580 | 0.71279651176306  | 0.00017164615025  |
| C | -0.71299909669485 | 4.16441788677337  | 0.00017054630266  |
| C | 0.70736475440143  | 4.16298664706754  | -0.00006536864560 |
| C | 5.36681420570375  | 1.42770378032389  | 0.00027115906376  |
| C | 6.57463812975188  | 0.70180754496249  | 0.00021414745784  |
| C | 6.57630315530291  | -0.71393777870527 | -0.00000406559886 |
| C | 5.36838493424025  | -1.43700473729945 | -0.00017195352870 |
| C | 1.43680059526725  | -5.36858893248398 | -0.00017423415862 |
| C | 0.71373351378679  | -6.57650704561858 | -0.00000733274774 |
| C | -0.70201188964730 | -6.57484186111287 | 0.00021063327592  |
| C | -1.42790796279108 | -5.36701788915132 | 0.00026843346923  |
| C | -5.36681404505655 | -1.42810888269509 | -0.00029619038973 |
| C | -6.57463751390834 | -0.70221227864896 | -0.00030307073042 |
| C | -6.57630205062342 | 0.71353291142899  | -0.00008433946276 |
| C | -5.36838392302842 | 1.43659961312048  | 0.00014818465568  |
| C | -1.43680173380569 | 5.36818039599370  | 0.00014624827505  |
| C | -0.71373448812728 | 6.57609810205140  | -0.00008704969515 |
| C | 0.70201064752667  | 6.57443314465468  | -0.00030550688059 |
| C | 1.42790683675647  | 5.36660952792689  | -0.00029777085504 |
| F | 5.41627239646772  | 2.75915019953073  | 0.00049387951638  |
| F | 5.41326978830010  | -2.76816073540622 | -0.00038269029513 |
| F | 2.76795660018944  | -5.41347389239669 | -0.00038485261771 |
| F | -2.75935471864547 | -5.41647614471042 | 0.00049088736852  |
| F | -5.41627327912549 | -2.75955566510677 | -0.00052738745415 |
| F | -5.41326772945803 | 2.76775426867008  | 0.00035245247430  |
| F | -2.76795635044867 | 5.41306490992751  | 0.00035029185110  |
| F | 2.75935330177894  | 5.41606797979593  | -0.00052887319395 |
| F | 7.74226636906939  | 1.34817298632491  | 0.00037076564576  |
| F | 7.74517659696649  | -1.35948894731833 | -0.00005010180659 |

|   |                   |                   |                   |
|---|-------------------|-------------------|-------------------|
| F | 1.35928448064144  | -7.74538053729203 | -0.00005409099290 |
| F | -1.34837749453536 | -7.74247003372037 | 0.00036627643824  |
| F | -7.74226591953191 | -1.34857720336371 | -0.00052688493350 |
| F | -7.74517540261769 | 1.35908401188477  | -0.00010518952979 |
| F | -1.35928508287653 | 7.74497174029930  | -0.00010882444853 |
| F | 1.34837585093753  | 7.74206133526552  | -0.00053003743954 |

## References

- [1] D. Balle, H. Adler, P. Grüniger, R. Karstens, R. Ovsyannikov, E. Giangrisostomi, T. Chassé and H. Peisert, *The Journal of Physical Chemistry C*, 2017, **121**, 18564–18574.
- [2] K. Greulich, M. Trautmann, A. Belser, S. Bölke, R. Karstens, P. Nagel, S. Schuppler, M. Merz, A. Chassé, T. Chassé and H. Peisert, *The Journal of Physical Chemistry C*, 2021, **125**, 6851–6861.
- [3] J. Uihlein, M. Polek, M. Glaser, H. Adler, R. Ovsyannikov, M. Bauer, M. Ivanovic, A. B. Preobrajenski, A. V. Generalov, T. Chassé and H. Peisert, *The Journal of Physical Chemistry C*, 2015, **119**, 15240–15247.
- [4] R. Karstens, M. Glaser, A. Belser, D. Balle, M. Polek, R. Ovsyannikov, E. Giangrisostomi, T. Chassé and H. Peisert, *Molecules*, 2019, **24**, 4579.
- [5] A. Belser, R. Karstens, P. Nagel, M. Merz, S. Schuppler, T. Chassé and H. Peisert, *physica status solidi (b)*, 2019, **256**, 1800292.
- [6] F. Petraki, H. Peisert, F. Latteyer, U. Aygöl, A. Vollmer and T. Chassé, *The Journal of Physical Chemistry C*, 2011, **115**, 21334–21340.
